# Supplementary material
Source: publisher figshare collection journal article supplement (https://tandf.figshare.com/articles/dataset/_/5896009)
Supplement: Supplementary file 1 [file 1]

Archive with 3 entries (3 files):
- tbbb_a_1422107_sm5372.xlsx
- tbbb_a_1422107_sm5371.pdf
- tbbb_a_1422107_sm5370.pdf
