# Supplementary material
Source: publisher figshare collection journal article supplement (https://tandf.figshare.com/articles/dataset/_/5896009)
Supplement: Supplementary file 1 [file 1 › tbbb_a_1422107_sm5370.pdf]

## Supplemental Figures

“Jasmonic acid facilitates flower opening and floral organ development through the upregulated expression of SIMYB21 transcription factor in tomato”

Niwa *et al.*

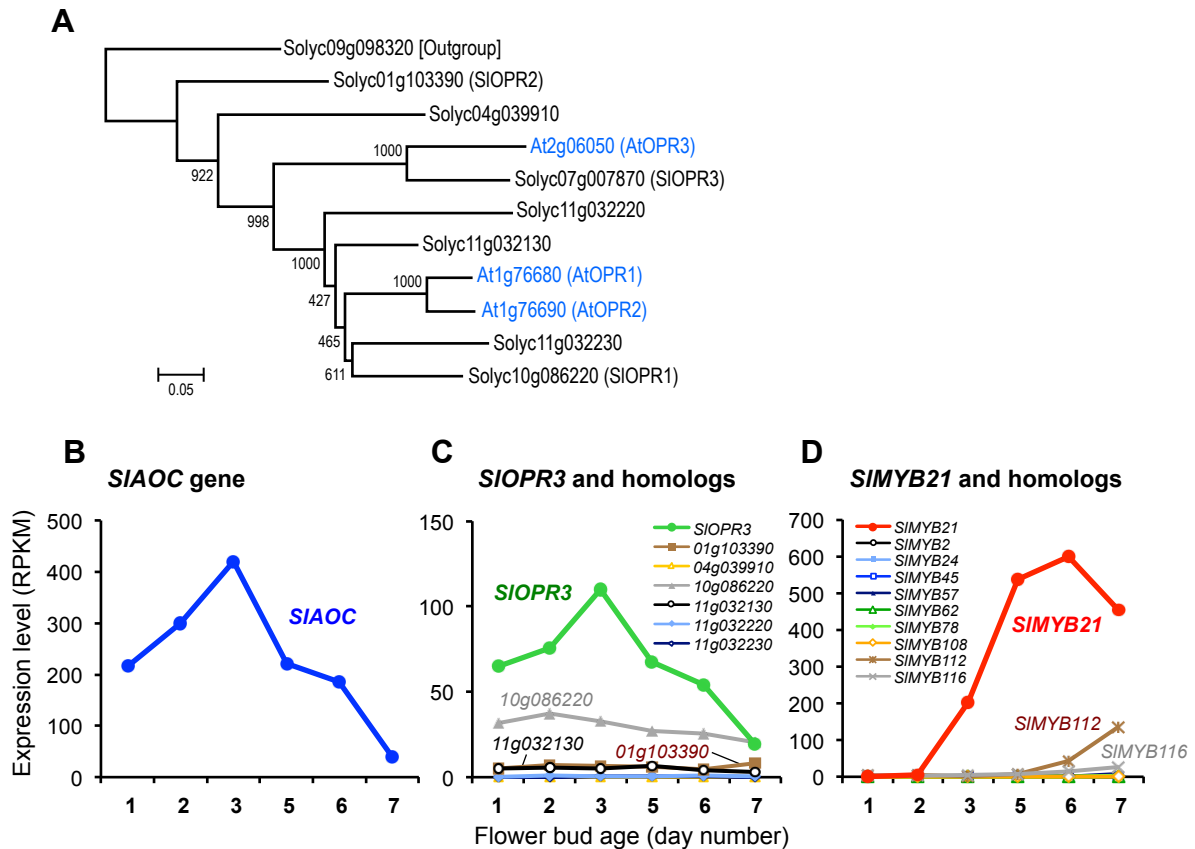

**Supplemental Fig. S1** Expression levels of *SIAOC*, *SIOPR3*, and *SIMYB21* genes and their homologs during flower bud development evaluated by RNA-seq analysis.

Note: (A) Neighbor-joining tree showing similarity among tomato and Arabidopsis *OPR3* homologs calculated by Clustal W 2.1 using the protein sequences. Bootstrap values are indicated at the branch points. Prefixes At and Solyc indicate Arabidopsis and tomato genes, respectively. Solyc09g098320 was included as an outgroup.

(B) Expression level of *SIAOC*, a unique homolog of *AtAOC* genes.

(C) Expression levels of tomato genes indicated in (A).

(D) Expression levels of the *SIMYB21* gene and its tomato homologs indicated in Fig. 2 (F).

In (B), (C), and (D), numbers on the horizontal axis indicate bud ages in days. The expression levels are indicated by reads per kilobase of exon per million mapped reads (RPKM).  $n = 1$ .

Micro-Tom (MT-J) was used.

**A****WT (M8)**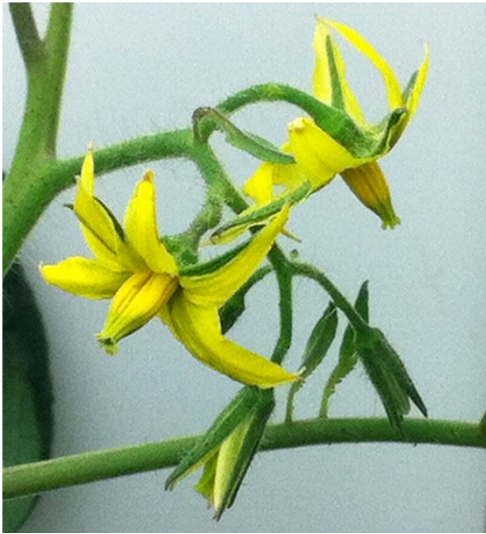**B*****AtMYB24-SRDX***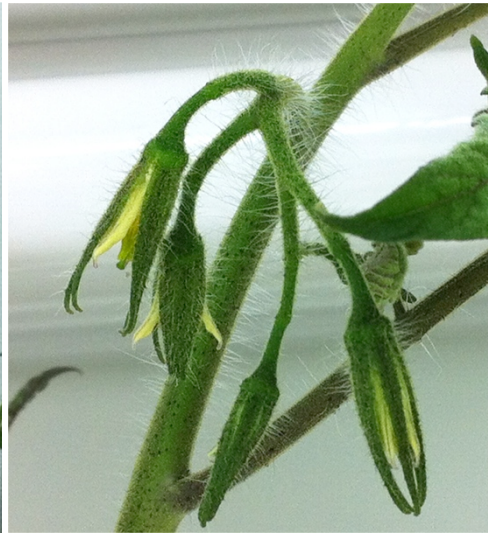

**Supplemental Fig. S2** Inflorescences of WT (A) and an *AtMYB24-SRDX* transgenic tomato plant showing an opening-deficient phenotype (B). Both are in a Momotaro 8 background.
