# Supplementary material
Source: publisher figshare collection journal article supplement (https://tandf.figshare.com/articles/dataset/_/5896009)
Supplement: Supplementary file 1 [file 1 › tbbb_a_1422107_sm5371.pdf]

**Supplemental Table S1. List of qRT-PCR primers used in this study**

| Target gene    | Primer name         | Sequence                  |
|----------------|---------------------|---------------------------|
| <i>SIAOC</i>   | SI-AOC+246F         | TGAACGTGATCGTGGAAGCCCTGCT |
|                | SI-AOC+395R         | TTGATCAGAATGCAGAGTCCTGCTG |
| <i>SIOPR3</i>  | SI-OPR3-like1+931F  | ATGGACTCTAATCCACTCAGCCTTG |
|                | SI-OPR3-like1+1082R | TCACTGCCAAGTCTGCCTGCTTCAG |
| <i>SIMYB21</i> | SIMYB21_fwd         | CTCTCTAGCTAAATCTGCTGGTCTC |
|                | SIMYB21+R463        | CCTCCTGACATCAGGTCGAAG     |
| <i>DNAJ</i>    | SIDnaJ_fwd          | CGCAATGTGTTGTGCTCAAAGTGCA |
|                | SIDnaJ_rev          | GTGCTGCATCTGCTGGATCATG    |
| <i>SAND</i>    | SAND_fwd            | TTGCTTGGAGGAACAGACG       |
|                | SAND_rev            | GCAAACAGAACCCCTGAATC      |
