# Supplementary material
Source: publisher figshare collection journal article supplement (https://tandf.figshare.com/articles/dataset/_/5896009)
Supplement: Supplementary file 1 [file 1 › tbbb_a_1422107_sm5372.xlsx]

## Sheet: tag_count
Niwa et al.
Supplemental Table S2. RNA sequencing analysis of a series of developing flower buds in Micro-Tom
	Flower bud age
Gene ID	Day 1	Day 2	Day 3	Day 5	Day 6	Day 7	Annotation
Solyc00g005000.2	0	0	1	0	0	0	Aspartic proteinase nepenthesin I
Solyc00g005040.2	6	9	7	2	2	2	Potassium channel
Solyc00g005050.2	141	155	208	141	176	46	Arabinogalactan protein
Solyc00g005070.1	114	143	178	111	123	35	Unknown Protein
Solyc00g005080.1	3	3	2	5	0	0	Ycf2
Solyc00g005100.1	0	0	0	0	2	0	Unknown Protein
Solyc00g005110.1	3	3	0	0	0	0	Unknown Protein
Solyc00g005150.1	19	26	37	16	7	10	HAT dimerisation domain-containing protein-like
Solyc00g005160.1	5	16	8	5	3	5	Retrovirus-related Pol polyprotein from transposon TNT 1-94
Solyc00g005170.1	2	3	3	1	1	1	Unknown Protein
Solyc00g005430.1	7	8	12	9	15	4	Unknown Protein
Solyc00g005440.1	150	226	205	119	91	39	40S ribosomal protein S9
Solyc00g005450.1	0	0	1	0	0	0	Unknown Protein
Solyc00g005460.1	6	7	8	1	3	3	Unknown Protein
Solyc00g005470.1	10	11	7	6	5	0	40S ribosomal protein S9
Solyc00g005840.2	202	238	212	119	86	69	Thioredoxin family protein
Solyc00g005860.1	6	8	8	11	4	5	Unknown Protein
Solyc00g005870.1	15	17	15	19	13	5	Mutator-like transposase
Solyc00g005880.1	5	3	4	4	3	0	Unknown Protein
Solyc00g005890.2	2	4	1	0	1	0	Unknown Protein
Solyc00g005900.1	82	85	60	31	14	5	Oxygen-evolving enhancer protein 1%2C chloroplastic
Solyc00g006010.1	0	0	0	0	1	0	Unknown Protein
Solyc00g006020.1	0	0	0	0	1	0	Endonuclease/exonuclease/phosphatase
Solyc00g006050.1	15	4	2	2	13	6	Unknown Protein
Solyc00g006470.1	50841	48451	17218	31923	10168	22661	Unknown Protein
Solyc00g006480.1	0	0	0	0	1	1	Glucosyltransferase-12
Solyc00g006490.2	214	276	285	206	195	82	Serine/threonine-protein phosphatase 6 regulatory subunit 3
Solyc00g006540.1	5	4	2	2	0	1	Unknown Protein
Solyc00g006560.1	0	0	0	0	0	1	Glucosyltransferase-12
Solyc00g006590.1	1	0	0	0	0	25	Unknown Protein
Solyc00g006600.1	16	25	27	15	6	8	HAT family dimerisation domain containing protein
Solyc00g006630.1	0	1	0	0	0	0	Unknown Protein
Solyc00g006650.1	0	1	0	0	0	4	Unknown Protein
Solyc00g006670.2	21545	20581	7293	13867	4388	9565	Unknown Protein
Solyc00g006680.1	17646	17289	5979	11671	3630	7932	Plant senescence-associated protein (Fragment)
Solyc00g006690.2	33473	31520	10498	20645	6674	14424	Unknown Protein
Solyc00g006700.1	0	0	3	0	0	0	Unknown Protein
Solyc00g006800.2	757	751	1103	608	524	380	Transaldolase
Solyc00g006810.2	145	166	153	121	98	57	Peptidyl-prolyl cis-trans isomerase
Solyc00g006820.2	213	215	344	227	175	88	Peptide transporter-like protein
Solyc00g006830.2	216	241	402	282	191	75	No exine formation-1
Solyc00g006850.1	45	0	0	0	0	0	Unknown Protein
Solyc00g006860.1	5	0	0	0	0	0	Unknown Protein
Solyc00g006890.1	1	2	0	1	0	0	Unknown Protein
Solyc00g006900.1	1	7	10	9	6	2	Unknown Protein
Solyc00g007010.2	70	108	306	1100	2019	181	Phosphatidylinositol phosphate (PtdInsP) phosphatase involved in hydrolysis of PtdIns
Solyc00g007020.1	0	0	0	0	1	0	Tetratricopeptide repeat protein 5
Solyc00g007030.1	0	1	1	1	1	0	Glutathione S-transferase
Solyc00g007040.1	1	1	1	1	0	0	Glutathione-S-transferase
Solyc00g007050.1	0	1	0	0	1	1	Unknown Protein
Solyc00g007060.2	112	106	87	79	82	60	Serine/threonine kinase-like protein ABC1063
Solyc00g007070.2	559	748	583	433	340	186	Heterogeneous nuclear ribonucleoprotein H1
Solyc00g007080.2	20	46	71	189	311	28	Unknown Protein
Solyc00g007090.2	70	73	124	129	140	48	Multi-pass transmembrane protein
Solyc00g007100.2	140	180	208	385	1501	1988	Serine/threonine protein kinase
Solyc00g007110.2	33	28	64	75	86	20	Epidermal growth factor receptor substrate 15
Solyc00g007120.2	78	123	188	143	164	54	Calcium-binding EF hand family protein
Solyc00g007130.2	13	17	15	17	8	2	Amino acid transporter family protein
Solyc00g007140.1	32	55	27	13	9	7	Unknown Protein
Solyc00g007150.2	44	63	45	7	9	10	Unknown Protein
Solyc00g007160.1	1	0	0	0	0	2	Transposase
Solyc00g007190.2	5	5	9	25	290	4	Serine/threonine phosphatase family protein
Solyc00g007200.2	95	89	92	84	49	49	MLO-like protein 3
Solyc00g007220.2	17	34	26	33	32	17	Ring finger protein
Solyc00g007230.1	3	0	0	2	0	0	Pol polyprotein
Solyc00g007240.1	1	0	0	0	0	0	Retrovirus-related Pol polyprotein from transposon TNT 1-94
Solyc00g007250.1	0	1	0	1	0	0	Pol polyprotein
Solyc00g007260.2	91	147	142	72	66	27	Sentrin-specific protease 7
Solyc00g007270.2	492	690	788	548	542	300	Translation initiation factor
Solyc00g007290.1	0	0	0	0	1	4	Ulp1 protease family C-terminal catalytic domain containing protein
Solyc00g007300.2	160	252	229	166	188	208
Solyc00g007310.1	8	7	10	10	8	4	Unknown Protein
Solyc00g007350.1	1	0	0	0	0	0	Zinc finger CCCH domain-containing protein 30
Solyc00g007450.1	0	1	0	0	0	0	Zinc finger CCCH domain-containing protein 30
Solyc00g007550.1	3	7	4	3	0	1	Unknown Protein
Solyc00g007560.1	2	2	2	2	2	5	Serine/threonine-protein phosphatase 7 long form homolog
Solyc00g007570.1	0	3	0	0	0	1	Polygalacturonase
Solyc00g007600.1	2	4	0	5	3	0	Meiotic recombination protein DMC1
Solyc00g008270.1	0	1	1	0	0	0	Unknown Protein
Solyc00g008570.2	20610	19512	6877	13194	4257	9069	Unknown Protein
Solyc00g008580.1	14756	14007	5214	9275	2947	6775	Unknown Protein
Solyc00g008680.2	393	427	511	373	457	245	Calcium binding protein-like
Solyc00g008690.1	0	0	1	0	0	0	Unknown Protein
Solyc00g008900.1	2	2	0	0	0	1	Unknown Protein
Solyc00g008910.1	1	0	0	0	0	0	Unknown Protein
Solyc00g009020.2	1158	1354	1891	2004	2438	429	Mitochondrial ATP synthase
Solyc00g009030.1	137	9	3	0	0	2	Solute carrier family 2%2C facilitated glucose transporter member 12
Solyc00g009040.2	221	582	1098	616	281	55	Polyadenylate-binding protein 2
Solyc00g009050.1	14	11	4	4	2	1	UPF0544 protein C5orf45
Solyc00g009060.2	46	148	136	48	57	13	Hypoxanthine phosphoribosyltransferase
Solyc00g009070.1	0	0	8	225	42	0	Unknown Protein
Solyc00g009080.2	86	90	184	87	51	16	Unknown Protein
Solyc00g009090.2	24	21	15	2	2	0
Solyc00g009100.2	67	83	78	58	40	13	30S ribosomal protein S1-like
Solyc00g009110.2	84	138	221	180	214	145	Inositol-1 4 5-trisphosphate 5-Phosphatase-like protein
Solyc00g009120.2	59	90	145	94	111	108	Short-chain dehydrogenase/reductase family protein
Solyc00g009130.2	39	59	81	78	68	52	Dehydrogenase/reductase SDR family member 12
Solyc00g009140.2	70	82	147	125	118	99	Short-chain dehydrogenase/reductase SDR
Solyc00g009440.1	0	0	2	0	0	0	Unknown Protein
Solyc00g009650.1	0	0	0	0	0	2	Unknown Protein
Solyc00g009660.1	1	0	0	0	0	0	Unknown Protein
Solyc00g009760.2	37150	36212	13166	23369	7576	16199	Cytochrome P450 monooxygenase (Fragment)
Solyc00g009770.1	10	7	3	4	3	3	Unknown Protein
Solyc00g009780.1	5202	5330	1744	3001	963	2111	Unknown Protein
Solyc00g009800.1	5308	5166	1725	3023	996	2141	Unknown Protein
Solyc00g010100.1	2	1	1	0	0	0	Unknown Protein
Solyc00g010110.1	304	309	112	173	58	134	Unknown Protein
Solyc00g010520.1	1	0	0	0	0	1	Unknown Protein
Solyc00g010530.1	9814	9090	3352	6412	1964	4645	Unknown Protein
Solyc00g010540.1	2	1	0	0	1	0	Pol polyprotein
Solyc00g010550.1	14040	13151	4763	8190	2575	5804	Unknown Protein
Solyc00g010750.1	36	61	68	34	49	48	Guanylate binding protein 2
Solyc00g010760.1	2	7	20	14	8	8	Helicase-like protein
Solyc00g010770.1	31	31	38	45	49	56	Unknown Protein
Solyc00g010780.1	0	0	1	0	0	1	Unknown Protein
Solyc00g010790.1	4	4	6	2	4	2	Unknown Protein
Solyc00g010930.1	1	0	0	0	1	0	Unknown Protein
Solyc00g011130.1	2	2	1	0	1	0	Unknown Protein
Solyc00g011140.1	2576	2553	962	1622	521	1125	Unknown Protein
Solyc00g011150.1	14175	13304	5052	8935	2992	6305	Unknown Protein
Solyc00g011160.1	29681	27899	9978	17910	5713	12032	Unknown Protein
Solyc00g011170.1	8176	8091	2827	5063	1689	3726	Unknown Protein
Solyc00g011180.1	1	1	1	0	0	0	Unknown Protein
Solyc00g011560.1	0	0	3	3	2	2	E3 ubiquitin-protein ligase SINA-like 10
Solyc00g011660.1	1	0	0	0	0	0	B3 domain-containing protein At1g49475
Solyc00g011870.1	2	0	4	2	1	0	Phosphatase 1G
Solyc00g011880.2	44	47	67	63	58	23	AIG2-like protein
Solyc00g011890.2	382	406	938	1101	771	761	Galactokinase like protein
Solyc00g012430.1	9300	8963	3328	5980	1853	4319	Unknown Protein
Solyc00g012440.1	26410	24576	8384	16159	5235	11074	TO54-2 (Fragment)
Solyc00g012540.1	1	0	0	0	0	0	Zinc finger CCCH domain-containing protein 6
Solyc00g012640.1	18	1	3	2	3	1	DNA (cytosine-5)-methyltransferase DRM2
Solyc00g012800.1	1	0	0	0	0	0	Unknown Protein
Solyc00g013000.1	0	0	1	0	0	0	Unknown Protein
Solyc00g013100.1	0	0	0	1	0	0	Unknown Protein
Solyc00g013110.1	2	0	1	0	0	0	Unknown Protein
Solyc00g013120.2	19	19	11	4	4	6	Uncharacterized mitochondrial protein AtMg01330
Solyc00g013130.2	41	42	25	24	13	5	NADH-quinone oxidoreductase subunit N
Solyc00g013140.1	50	59	24	68	17	36	NADH dehydrogenase subunit 5 (Fragment)
Solyc00g013150.1	73	67	24	67	40	51	Unknown Protein
Solyc00g013160.1	12	5	7	6	1	1	Unknown Protein
Solyc00g013170.1	0	3	4	3	1	1	Unknown Protein
Solyc00g013180.1	16	12	6	18	2	11	NADH-ubiquinone oxidoreductase chain 4
Solyc00g013190.1	6	3	1	1	0	1	Unknown Protein
Solyc00g014790.2	10	4	4	2	2	1	Unknown Protein
Solyc00g014800.1	1	1	0	0	0	0	Zinc-finger protein 1
Solyc00g014810.1	0	0	0	0	0	1	Unknown Protein
Solyc00g014820.2	2	2	0	2	0	1	Unknown Protein
Solyc00g014830.2	45	55	23	46	10	20	NADH-quinone oxidoreductase subunit D
Solyc00g014840.1	7	11	4	15	3	1	Unknown Protein
Solyc00g014850.1	7	7	5	2	0	6	ORF86
Solyc00g014860.1	0	1	0	0	0	0	Unknown Protein
Solyc00g015600.1	7	10	12	5	10	7	Unknown Protein
Solyc00g017210.1	2	9	25	61	112	15	Actin
Solyc00g017230.1	0	0	0	0	0	1	Expansin
Solyc00g017530.1	6	13	2	3	1	3	Gag-Pol polyprotein
Solyc00g017540.1	2	4	9	5	11	2	Signal recognition particle 72 kDa protein homolog
Solyc00g017550.1	0	0	3	2	0	0	Signal recognition particle 72 kDa protein homolog
Solyc00g018970.1	2448	2367	853	1549	523	1060	Unknown Protein
Solyc00g019730.1	31	22	19	46	7	17	Cytochrome c oxidase subunit 3
Solyc00g019740.1	33	56	29	74	23	25	ATPase subunit 8
Solyc00g019750.1	17	21	9	18	3	9	Unknown Protein
Solyc00g019950.1	25	25	14	22	5	8	NADH-quinone oxidoreductase subunit C
Solyc00g019960.1	12	7	7	10	1	5	Unknown Protein
Solyc00g019970.2	11	17	7	11	0	10	Unknown Protein
Solyc00g019980.2	10	11	5	6	1	5	Unknown Protein
Solyc00g019990.1	2	2	0	3	2	0	Unknown Protein
Solyc00g020000.1	4	3	0	0	1	0	Unknown Protein
Solyc00g020010.1	2	1	2	2	1	0	Unknown Protein
Solyc00g020020.2	6	2	4	9	2	3	Unknown Protein
Solyc00g020030.1	0	0	2	6	0	1	Unknown Protein
Solyc00g020040.1	9	14	4	25	3	12	Cytochrome c biogenesis (Fragment)
Solyc00g020540.1	0	0	0	1	6	3	Aminotransferase-like protein
Solyc00g020840.2	5	8	4	2	2	0	Ferric reductase
Solyc00g021630.1	28	26	7	26	5	8	NADH-ubiquinone oxidoreductase chain 6 (Fragment)
Solyc00g021640.2	27	31	16	14	3	8	Ribosomal protein S4
Solyc00g021650.1	0	0	0	3	0	0	Unknown Protein
Solyc00g021660.1	0	0	0	0	0	1	Neutral invertase-like protein (Fragment)
Solyc00g022070.1	0	0	0	0	0	1	Unknown Protein
Solyc00g022080.1	0	0	1	0	0	0	Unknown Protein
Solyc00g022090.1	3	1	0	0	0	0	Unknown Protein
Solyc00g022100.1	52	53	20	30	19	32	Ribosomal protein L10 (Fragment)
Solyc00g022110.2	103	103	65	95	28	74	Ribosomal protein L2
Solyc00g023570.1	0	0	1	0	1	1	Unknown Protein
Solyc00g023580.1	0	0	2	0	0	0	Unknown Protein
Solyc00g023590.2	2	3	0	1	0	0	Unknown Protein
Solyc00g023600.1	0	0	0	1	0	0	Unknown Protein
Solyc00g023700.2	3	1	0	0	0	4	Unknown Protein
Solyc00g024150.2	537	507	471	276	296	240	Pterin-4-alpha-carbinolamine dehydratase
Solyc00g024160.1	3	1	1	0	0	0	ATP binding protein
Solyc00g024170.1	3	0	0	1	0	1	Unknown Protein
Solyc00g024570.1	0	0	0	0	3	0	F-box family protein
Solyc00g025290.1	6	4	4	7	4	1	Hypothetical protein (nad5 intron)
Solyc00g025400.2	1	0	1	0	0	0	Unknown Protein
Solyc00g026160.2	1	0	0	0	2	0	Ferric reductase oxidase
Solyc00g027120.1	0	0	9	0	0	2	Mutator-like transposase
Solyc00g027130.1	0	1	1	1	4	1	Sentrin-specific protease 2
Solyc00g027140.1	2	5	3	7	9	0	Ulp1 protease family C-terminal catalytic domain containing protein
Solyc00g027770.2	182	240	297	310	260	84	Pectinesterase
Solyc00g028420.1	1	0	1	0	1	2	Unknown Protein
Solyc00g029190.2	15	13	19	73	81	12	S-adenosyl-L-methionine salicylic acid carboxyl methyltransferase
Solyc00g029500.1	6	23	19	3	0	3	Unknown Protein
Solyc00g029800.1	3	0	2	1	1	1	Unknown Protein
Solyc00g030000.1	1	1	1	0	0	0	Cellulose synthase-4
Solyc00g030100.1	14	12	13	5	6	3	Unknown Protein
Solyc00g030110.1	1	2	2	3	1	1	Unknown Protein
Solyc00g030510.2	72	98	106	10530	39136	42331	Polygalacturonase
Solyc00g030520.2	50	56	84	108	168	242	Endoplasmic reticulum-Golgi intermediate compartment protein 3 (Predicted)
Solyc00g030820.1	1	2	1	1	0	1	Unknown Protein
Solyc00g032030.1	11	3	4	9	20	10	E3 ubiquitin-protein ligase SINA-like 10
Solyc00g032940.1	0	0	0	0	2	1	Ulp1 protease family C-terminal catalytic domain containing protein
Solyc00g033460.2	15	24	32	18	38	7	S-adenosyl-L-methionine salicylic acid carboxyl methyltransferase 1
Solyc00g034810.1	1	0	0	0	0	15	Calcineurin B-like calcium binding protein
Solyc00g036320.1	0	0	0	0	1	0	ARID/BRIGHT DNA binding domain containing protein
Solyc00g036520.1	0	0	2	0	0	0	Unknown Protein
Solyc00g036530.1	1	0	0	0	0	0	Unknown Protein
Solyc00g036540.1	7	15	3	3	2	2	50S ribosomal protein L2 chloroplastic
Solyc00g036750.1	0	0	4	0	0	2	Unknown Protein
Solyc00g038390.1	0	1	0	0	0	0	Unknown Protein
Solyc00g039290.1	43	0	0	0	0	0	Zinc-binding protein
Solyc00g039990.2	40	46	56	41	25	20	TRNA nucleotidyltransferase
Solyc00g040390.1	1	0	0	0	0	0	Hydroxycinnamoyl CoA quinate transferase
Solyc00g041090.1	2	0	4	2	3	1	Vacuolar-processing enzyme
Solyc00g042640.1	2	1	1	3	1	1	Helicase-like protein
Solyc00g042840.1	78	41	42	2	2	1	F-box domain containing protein
Solyc00g042850.1	13	0	0	0	0	0	GDSL esterase/lipase 7
Solyc00g044350.2	29	23	21	6	3	1	EPIDERMAL PATTERNING FACTOR-like protein 1
Solyc00g044550.1	6	3	3	2	3	0	Unknown Protein
Solyc00g044750.1	2	1	0	0	4	2	U1 small nuclear ribonucleoprotein A
Solyc00g045570.1	10	15	7	4	2	3	Unknown Protein
Solyc00g046570.1	0	0	1	1	0	0	Unknown Protein
Solyc00g046580.1	3	1	0	2	1	0	Serine/threonine-protein phosphatase 7 long form homolog
Solyc00g046980.1	0	0	1	0	0	0	Unknown Protein
Solyc00g047180.1	0	0	0	0	0	1	Unknown Protein
Solyc00g047190.1	1	0	0	0	0	0	Unknown Protein
Solyc00g047200.1	20	13	6	25	10	10	Cytochrome b
Solyc00g047700.2	840	1221	960	664	443	206	Unknown Protein
Solyc00g047810.1	2	1	0	0	1	0	Unknown Protein
Solyc00g048410.1	0	0	0	2	0	0	Unknown Protein
Solyc00g048510.2	0	1	0	1	0	0	Phloem lectin
Solyc00g049210.1	8	19	6	19	3	7	Cytochrome c-type biogenesis protein CcmF
Solyc00g049220.1	1	4	0	1	1	0	Unknown Protein
Solyc00g049520.2	49	57	65	69	69	53	Unknown Protein
Solyc00g049920.1	1	1	1	3	0	2	3-oxoacyl-reductase
Solyc00g050130.1	31	33	31	31	34	20	UDP-glucose glucosyltransferase
Solyc00g050430.2	151	164	105	20	19	6	BHLH transcription factor
Solyc00g052430.2	8	9	7	10	7	5	Cytochrome c biogenesis FC
Solyc00g052530.2	3	1	0	4	2	0	Unknown Protein
Solyc00g052540.1	0	0	0	0	1	0	Unknown Protein
Solyc00g052940.2	30	66	85	69	81	12	Nodulin-like protein
Solyc00g053440.2	132	43	55	56	52	30	Transmembrane BAX inhibitor motif-containing protein 4
Solyc00g056680.1	32	6	8	1	1	1	Lipase-like protein
Solyc00g057880.2	24	24	22	11	13	10	Unknown Protein
Solyc00g058280.1	0	0	1	0	2	0	Unknown Protein
Solyc00g058480.1	3	0	1	0	1	0	Paired amphipathic helix protein Sin3-like 1
Solyc00g058490.1	35	20	21	10	3	10	Ulp1 protease family C-terminal catalytic domain containing protein
Solyc00g058890.1	8	7	14	3	1	0	Unknown Protein
Solyc00g058900.1	2	1464	15	1	0	0	GDSL esterase/lipase At2g31540
Solyc00g059100.2	16	35	60	46	61	5	WD-repeat protein-like
Solyc00g059500.1	41	63	67	65	118	38	CDP-alcohol phosphatidyltransferase
Solyc00g062710.1	2	3	3	5	23	2	Unknown Protein
Solyc00g065510.1	4	6	6	5	3	1	Palmitoyltransferase swf1
Solyc00g066350.1	0	0	4	62	5	4	Serine/threonine-protein phosphatase 7 long form homolog
Solyc00g066360.1	0	2	3	128	14	14	Serine/threonine-protein phosphatase 7 long form homolog
Solyc00g066370.1	0	0	2	0	0	0	Unknown Protein
Solyc00g067470.1	0	2	1	0	1	2	Unknown Protein
Solyc00g068970.2	55202	52381	18668	34358	11035	23662	Cytochrome P450 like_TBP
Solyc00g068980.1	8621	8232	3167	5107	1852	3491	Unknown Protein
Solyc00g069680.1	52	55	20	37	7	20	Unknown Protein
Solyc00g069880.2	1	4	2	1	3	2	Unknown Protein
Solyc00g071180.2	208	591	13176	9570	8585	856	Cysteine proteinase inhibitor
Solyc00g072100.2	153	119	98	53	47	32	LTRGag-pol-polymerase 3
Solyc00g072400.2	1	0	0	0	0	0	Peroxidase 1
Solyc00g072800.2	6	9	1	8	1	2	Unknown Protein
Solyc00g073200.1	3	2	3	0	0	0	Transposon protein-like
Solyc00g074210.1	2	0	0	1	0	0	Mitochondrial import inner membrane translocase subunit TIM16
Solyc00g074830.1	3	4	5	5	2	1	FeS assembly protein SufD
Solyc00g075030.2	4	83	86	40	103	410	Gag polyprotein
Solyc00g075040.1	62	40	43	13	51	153	Transposon Ty1-A Gag-Pol polyprotein
Solyc00g075440.1	9	14	18	17	10	10	Unknown Protein
Solyc00g075450.2	34	37	70	74	63	62	Unknown Protein
Solyc00g076250.1	2	1	3	1	0	0	Unknown Protein
Solyc00g080550.1	0	3	1	0	0	5	Unknown Protein
Solyc00g080750.2	4	5	9	12	11	52	Unknown Protein
Solyc00g082150.2	541	542	637	511	726	190	Kinesin light chain
Solyc00g082550.1	10	11	7	6	7	2	Unknown Protein
Solyc00g084750.2	9	8	14	7	2	4	Pentatricopeptide repeat-containing protein
Solyc00g084760.1	0	1	1	0	0	0	RNase H family protein
Solyc00g084870.2	22	35	18	11	14	2	TCP family transcription factor
Solyc00g085070.2	660	571	573	1180	3225	4789	Squalene monooxygenase
Solyc00g085370.1	9	7	6	2	6	4	Unknown Protein
Solyc00g090870.2	44	63	81	38	31	16	5-AMP-activated protein kinase subunit beta-1
Solyc00g091170.2	158	142	152	74	67	38	ATP binding protein
Solyc00g092900.1	1	0	2	0	1	1	Unknown Protein
Solyc00g093000.1	12	10	16	12	27	9	Unknown Protein
Solyc00g093300.1	1	0	0	0	0	0	Transposase (Fragment)
Solyc00g093310.1	2	0	1	0	0	5	Unknown Protein
Solyc00g094520.1	2	7	4	6	0	4	Unknown Protein
Solyc00g094530.1	9	14	5	13	3	4	NADH-ubiquinone oxidoreductase chain 1
Solyc00g094540.1	15	15	8	7	5	9	Unknown Protein
Solyc00g094550.1	1	7	1	1	0	0	Unknown Protein
Solyc00g095760.1	34	31	27	20	13	8	1-aminocyclopropane-1-carboxylate synthase
Solyc00g095860.1	21	24	37	18	27	22	1-aminocyclopropane-1-carboxylate synthase
Solyc00g096060.1	5	2	3	1	0	0	Ectonucleoside triphosphate diphosphohydrolase 6
Solyc00g096460.1	15	15	28	15	14	2	AT4G08310 protein (Fragment)
Solyc00g097260.1	1	0	0	0	0	0	Unknown Protein
Solyc00g097960.1	46	48	20	21	13	7	Unknown Protein
Solyc00g098560.2	23	32	72	59	56	14	GDSL esterase/lipase At5g03980
Solyc00g099160.1	2	0	0	0	0	0	Unknown Protein
Solyc00g099580.1	38	44	34	23	15	4	Gamma-glutamyltranspeptidase
Solyc00g100880.2	7	1	0	0	1	1	GTP binding protein
Solyc00g102000.1	19464	17759	5936	11671	3740	7855	Unknown Protein
Solyc00g102400.2	36	64	47	39	29	14
Solyc00g104940.1	128	2	3	0	0	0	Bax inhibitor-1 like
Solyc00g105340.1	1	0	0	1	0	0	Genomic DNA chromosome 5 P1 clone MRD20
Solyc00g105350.1	2	0	0	3	1	1	Mutator-like transposase-like
Solyc00g105750.1	2	0	0	2	1	1	Mutator-like transposase
Solyc00g106650.1	20	6	18	24	21	5	BZIP transcription factor family protein expressed
Solyc00g107050.1	0	0	0	1	0	0	Nuclear transcription factor Y subunit C-1
Solyc00g107550.1	1	2	5	4	2	2	Unknown Protein
Solyc00g108550.1	6	3	0	2	0	1	Unknown Protein
Solyc00g110370.1	0	0	0	0	0	1	Unknown Protein
Solyc00g110870.2	203	114	139	100	154	81
Solyc00g111170.1	4	1	2	1	1	1	Unknown Protein
Solyc00g111270.1	1	7	8	13	5	1	Unknown Protein
Solyc00g112180.1	3	2	0	0	2	1	Unknown Protein
Solyc00g112190.2	6	2	1	2	6	1	Unknown Protein
Solyc00g112600.1	2	1	0	0	0	0	Sugar transport protein 2
Solyc00g112830.1	0	0	0	1	0	0	Short-chain dehydrogenase/reductase SDR
Solyc00g112930.2	0	1	1	0	0	0	Alpha-N-acetylglucosaminidase
Solyc00g113750.1	1	5	5	1	0	0	ImcF domain protein
Solyc00g117450.2	48	5	15	9	5	1	Short internode related sequence 5
Solyc00g118680.2	38	51	14	29	9	11	Unknown Protein
Solyc00g118690.1	14	26	12	16	5	7	NADH-ubiquinone oxidoreductase chain 1
Solyc00g120930.1	2	2	6	7	2	2	Calmodulin
Solyc00g121730.1	29	54	63	67	43	21	%26aposchromo%26apos domain containing protein
Solyc00g123240.1	0	0	0	0	0	1	Unknown Protein
Solyc00g125580.1	9	24	21	19	10	5	Ulp1 protease family C-terminal catalytic domain containing protein
Solyc00g125980.1	15	9	5	9	7	1	NADH-ubiquinone oxidoreductase chain 2
Solyc00g125990.1	31	26	17	21	11	3	NADH-quinone oxidoreductase subunit N
Solyc00g126000.1	8	7	6	1	2	1	NADH-ubiquinone oxidoreductase chain 2
Solyc00g126010.1	6	8	6	0	1	1	Uncharacterized mitochondrial protein AtMg01330
Solyc00g127660.2	129	164	196	184	236	104	Unknown Protein
Solyc00g127670.1	41	64	38	20	17	8	Membrane protein
Solyc00g127870.2	78	61	111	377	810	382	Phosphatidylinositol N-acetylglucosaminyltransferase subunit P
Solyc00g128870.2	132	191	149	73	68	42	Nudix hydrolase 1
Solyc00g131610.1	0	1	0	0	0	0	Disease resistance response
Solyc00g131710.1	40	72	70	59	39	14	Pol polyprotein
Solyc00g133110.1	2	4	2	5	1	0	Peptidase M14 carboxypeptidase A
Solyc00g133720.1	12	14	21	22	17	7	Unknown Protein
Solyc00g135260.1	1	6	6	9	3	0	Transferase family protein
Solyc00g136260.1	8	14	29	38	92	54	Ring H2 finger protein
Solyc00g136560.2	15	19	23	11	20	29	Undecaprenyl pyrophosphate synthase
Solyc00g138060.2	5	4	10	7	6	0	2-oxoglutarate-dependent dioxygenase
Solyc00g139760.1	5	4	5	2	2	0	Filamentous hemagglutinin family outer membrane protein
Solyc00g140060.2	57	109	123	221	223	60	Tripeptidyl peptidase II
Solyc00g141560.1	2	5	4	3	6	12	Unknown Protein
Solyc00g142160.1	4	2	1	0	1	0	Unknown Protein
Solyc00g142170.2	11	12	5	2	3	1	RNA-dependent RNA polymerase
Solyc00g143770.1	42	26	33	22	31	16	Unknown Protein
Solyc00g144470.1	28	27	28	5	2	2	Serine/threonine-protein phosphatase 7 long form homolog
Solyc00g145170.1	188	369	6709	4338	5142	1461	Proteinase inhibitor II
Solyc00g147570.2	2	3	8	127	163	16	Gelsolin (Fragment)
Solyc00g147770.1	36	55	60	28	32	42	HAT family dimerisation domain containing protein
Solyc00g149970.2	8	8	22	16	8	6	Pho1-like protein
Solyc00g153680.1	4	2	2	4	7	1	Serine/threonine protein kinase
Solyc00g153980.1	0	0	1	0	0	1	Unknown Protein
Solyc00g154480.1	1	0	0	0	0	0	Cellulose synthase-like protein E1
Solyc00g156980.2	124	167	141	72	41	11	Choline dehydrogenase
Solyc00g157080.1	0	4	5	2	17	392	Pto kinase interactor-like protein
Solyc00g157180.2	8	18	16	20	12	3	cDNA clone J033046E14 full insert sequence
Solyc00g160780.2	26	36	60	41	15	8	Unknown Protein
Solyc00g163580.1	0	3	2	2	3	9	O-methyltransferase
Solyc00g164580.1	0	1	2	3	0	1	Unknown Protein
Solyc00g164680.1	38	68	98	94	112	65	ABC transporter G family member 11
Solyc00g165080.1	30	0	0	1	42	21	Unknown Protein
Solyc00g166490.1	0	0	1	3	3	2	Ulp1 protease family C-terminal catalytic domain containing protein
Solyc00g166690.1	1	1	0	5	4	10	Unknown Protein
Solyc00g168200.1	11	13	22	10	4	4	Unknown Protein
Solyc00g170200.1	157	143	178	157	99	56	Hydrolase alpha/beta fold family protein
Solyc00g170210.2	71	90	152	102	97	27	Unknown Protein
Solyc00g171710.1	0	1	1182	1365	1250	376	Unknown Protein
Solyc00g171810.2	90	69	88	143	90	58	ATP synthase subunit a
Solyc00g172410.1	1	3	2	3	6	2	DNA binding protein-like
Solyc00g174330.2	19	13	14	104	81	762	Pathogenesis related protein PR-1
Solyc00g174340.1	19	17	14	136	102	1014	Pathogenesis-related protein 1b
Solyc00g178340.1	0	0	12	31	36	1	Branched-chain-amino-acid aminotransferase
Solyc00g179240.1	2	6	16	5	10	2	MADS-box transcription factor
Solyc00g179640.1	4926	5087	1722	2783	895	1998	Unknown Protein
Solyc00g179840.1	10	11	10	5	0	6	Unknown Protein
Solyc00g180440.1	1	3	1	0	0	0	50S ribosomal protein L20 chloroplastic
Solyc00g180840.1	1	0	5	2	4	5	Unknown Protein
Solyc00g181240.1	1	0	0	0	0	0	Unknown Protein
Solyc00g181250.2	1	0	1	0	0	2	Unknown Protein
Solyc00g183050.1	2	5	2	3	9	3	FYVE zinc finger containing protein
Solyc00g183550.1	2	4	2	1	1	1	Unknown Protein
Solyc00g184350.2	52	39	38	35	28	12	Genomic DNA chromosome 5 P1 clone MJJ3
Solyc00g186050.1	2	7	7	4	1	2	Unknown Protein
Solyc00g187050.2	3209	4891	51124	6034	4457	130	Leucyl aminopeptidase
Solyc00g188250.1	2	2	1	4	4	2	Mutator-like transposase-like protein
Solyc00g188850.2	11	8	7	8	4	5	Glycosyltransferase CAZy family GT90 (Fragment)
Solyc00g192150.2	0	0	1	0	0	0	Mutator-like transposase
Solyc00g195350.1	5	4	4	3	1	0	Serine/threonine-protein phosphatase 7 long form homolog
Solyc00g195360.1	24	24	21	11	6	5	Serine/threonine-protein phosphatase 7 long form homolog
Solyc00g196060.2	184	248	290	253	230	147	Auxin response factor 6
Solyc00g196460.1	1	0	2	2	6	0	Unknown Protein
Solyc00g201060.1	2	0	1	0	0	0	Unknown Protein
Solyc00g201160.2	20	23	22	17	14	6	Receptor protein kinase
Solyc00g201460.1	0	1	0	4	0	0	Ulp1 protease family C-terminal catalytic domain containing protein
Solyc00g203660.1	140	188	60	49	14	42	Ribulose bisphosphate carboxylase large chain (Fragment)
Solyc00g206460.1	183	284	565	214	247	242	Os06g0220000 protein (Fragment)
Solyc00g207960.1	5	10	5	1	9	7	Unknown Protein
Solyc00g209460.1	28	3	0	1	0	0	GDSL esterase/lipase At1g71691
Solyc00g209560.1	2	5	44	6	6	9	Ulp1 protease family C-terminal catalytic domain containing protein
Solyc00g210860.1	0	0	0	0	0	1	Unknown Protein
Solyc00g212260.1	6	17	23	22	30	167	GH3 family protein
Solyc00g215560.1	4	9	6	4	4	3	Unknown Protein
Solyc00g217560.1	1	0	2	1	0	1	Transcription factor CYCLOIDEA (Fragment)
Solyc00g217960.1	14	17	28	22	29	8	Ring H2 finger protein
Solyc00g218560.1	0	2	0	0	0	0	Unknown Protein
Solyc00g220360.1	1	0	0	0	0	0	Unknown Protein
Solyc00g222460.1	0	2	0	0	0	0	Gag-Pol polyprotein
Solyc00g226760.1	1	3	0	1	0	0	Steroid sulfotransferase 3
Solyc00g227860.1	201	195	214	221	186	43	UDP-glucosyltransferase
Solyc00g227960.1	1	3	0	1	0	0	Sulfotransferase family protein
Solyc00g228260.1	780	1	2	0	1	1	Unknown Protein
Solyc00g229260.1	3	0	4	0	0	1	TdcA1-ORF2 protein (Fragment)
Solyc00g230060.1	2	2	1	1	0	13	RNase H family protein
Solyc00g230070.1	52	73	20	26	5	15	Photosystem II CP43 chlorophyll apoprotein
Solyc00g230080.1	46	69	21	30	6	29	Photosystem II D2 protein
Solyc00g231680.1	12	34	31	9	13	4	Mannan endo-1 4-beta-mannosidase
Solyc00g231780.1	5	9	8	6	5	1	NAD(P)H-quinone oxidoreductase subunit I chloroplastic
Solyc00g233480.1	0	0	2	1	0	0	ABC transporter-like protein
Solyc00g244280.1	6	8	2	3	2	1	Unknown Protein
Solyc00g244290.1	18	24	11	10	4	6	NADH dehydrogenase subunit II (Fragment)
Solyc00g244300.1	9	23	12	4	5	3	Unknown Protein
Solyc00g245200.1	6	4	5	6	1	2	Photosystem I P700 chlorophyll a apoprotein A1
Solyc00g247300.2	9	11	3	0	1	9
Solyc00g249200.1	1	0	0	0	0	2	Ulp1 protease family C-terminal catalytic domain containing protein
Solyc00g249900.2	61	87	108	72	94	30	Adaptin N terminal region family protein expressed
Solyc00g249910.1	4	6	20	27	35	10	Adaptin N terminal region family protein expressed
Solyc00g254910.1	7	28	25	12	31	188	Indole-3-acetic acid-amido synthetase GH3.8
Solyc00g255510.1	39	0	0	0	0	0	Unknown Protein
Solyc00g256710.1	33	34	51	43	67	18	Unknown Protein
Solyc00g257110.2	98	179	146	25373	54752	48565	H-ATPase
Solyc00g265110.2	22	38	25	45	58	4	RNA-binding protein Nova-1 (Fragment)
Solyc00g265510.1	0	0	0	18	28	5	Unknown Protein
Solyc00g266110.1	1	0	0	1	2	14	Indole-3-acetic acid-amido synthetase GH3.8
Solyc00g270510.1	0	0	0	0	0	17	Nuclear transcription factor Y subunit B-6
Solyc00g272810.1	0	1	2	1	1	0	N-acetyltransferase
Solyc00g273110.1	34	41	40	28	24	17	Unknown Protein
Solyc00g275310.1	2	2	2	1	2	0	Unknown Protein
Solyc00g277510.1	363	522	167	272	82	251	Photosystem Q(B) protein
Solyc00g278110.2	72	292	65	35	27	15	CER1
Solyc00g280110.1	2	2	0	1	1	3	Plant-specific domain TIGR01589 family protein
Solyc00g281110.1	0	1	0	0	0	0	Unknown Protein
Solyc00g282510.1	759	386	670	382	427	200	Phenylalanine ammonia-lyase
Solyc00g283010.1	1	7	2	0	1	0	Multidrug resistance protein ABC transporter family
Solyc00g283110.1	0	0	0	1	0	0	Unknown Protein
Solyc00g287330.1	3	0	2	1	1	1	Unknown Protein
Solyc00g289230.1	7	7	11	6	9	13	Receptor protein kinase
Solyc00g294230.1	80	22	34	26	21	17
Solyc00g294630.1	0	0	0	1	0	0	Mutator-like transposase
Solyc00g304030.1	1	0	0	1	0	1	Macrolide export ATP-binding/permease protein MacB
Solyc00g304630.1	1	0	0	1	0	0	Ulp1 protease family C-terminal catalytic domain containing protein
Solyc00g306730.1	0	0	1	0	0	1	Mutator-like transposase
Solyc00g308930.1	1	0	0	0	0	0	Lysine-specific histone demethylase 1 homolog 3
Solyc00g309530.1	1	3	0	2	0	0	Unknown Protein
Solyc00g311230.2	13	24	15	18	6	3	Unknown Protein
Solyc00g313930.1	10	18	15	6	5	3	Unknown Protein
Solyc00g316030.1	0	0	0	0	2	0	Mutator-like transposase
Solyc00g316530.1	7	7	5	2	3	1	Unknown Protein
Solyc00g316730.1	0	0	0	0	2	0	Mutator-like transposase
Solyc00g318830.1	55	12	9	2	0	0	Os01g0126600 protein (Fragment)
Solyc00g320430.1	6	8	3	6	1	3	Unknown Protein
Solyc00g322630.1	1	0	1	1	2	15	Indole-3-acetic acid-amido synthetase GH3.8
Solyc00g323130.2	25	52	60	21	19	9	Major latex-like protein
Solyc00g324530.1	2	3	4	4	4	7	Ulp1 protease family C-terminal catalytic domain containing protein
Solyc01g005000.2	193	298	564	516	489	310	Glutamate decarboxylase
Solyc01g005010.2	77	79	50	18	11	18	Protein XRI1
Solyc01g005020.2	302	366	454	376	348	144	Sodium/hydrogen exchanger Na+ H+ antiporter
Solyc01g005030.2	112	309	186	285	334	47	Serine/threonine-protein kinase 36
Solyc01g005040.2	0	0	2	1	2	2	Unknown Protein
Solyc01g005050.2	2	1	4	309	1295	828	Unknown Protein
Solyc01g005060.2	31	36	33	24	11	7	Zinc finger protein
Solyc01g005070.2	2	2	3	1	13	1037	Clathrin assembly protein
Solyc01g005080.2	232	219	283	329	344	352	Microtubule-associated protein MAP65-1a
Solyc01g005100.2	70	101	99	43	39	20	Prolyl 3-hydroxylase 1
Solyc01g005110.2	44	63	89	207	210	53	cDNA clone J065210E11 full insert sequence
Solyc01g005120.2	136	168	151	181	289	459	Xyloglucan endotransglucosylase/hydrolase 13
Solyc01g005130.2	51	23	34	37	23	5	Zinc finger protein 7
Solyc01g005140.2	2	0	0	0	0	0	Cytochrome b561
Solyc01g005150.2	5	9	20	17	16	5	Cytochrome b561
Solyc01g005160.2	48	0	0	2	3	6	U-box domain-containing protein
Solyc01g005170.1	2	4	3	1	2	2	Clathrin assembly protein
Solyc01g005180.1	2	4	5	2	0	0	Unknown Protein
Solyc01g005190.1	5	2	1	0	0	2	Zinc finger family protein
Solyc01g005200.1	1	0	0	0	0	0	Zinc finger family protein
Solyc01g005210.2	117	233	310	207	133	51	Alpha alpha-trehalose-phosphate synthase (UDP-forming)
Solyc01g005220.2	5	9	23	29	37	24	Necrotic spotted lesions 1 (Fragment)
Solyc01g005230.2	6	3	10	17	13	3	S-adenosyl-L-methionine salicylic acid carboxyl methyltransferase
Solyc01g005240.2	233	357	472	623	520	351	Aspartokinase
Solyc01g005250.2	224	319	411	268	178	52	Aspartate-semialdehyde dehydrogenase
Solyc01g005260.2	44	28	48	29	27	18	SEC14 cytosolic factor family protein
Solyc01g005270.2	43	34	48	24	23	17	SEC14 cytosolic factor family protein
Solyc01g005280.2	61	51	47	67	74	33	SEC14 cytosolic factor
Solyc01g005290.2	175	32	48	31	42	7	SEC14 cytosolic factor family protein
Solyc01g005300.2	64	92	126	170	340	34	Flavin-binding kelch domain F box protein
Solyc01g005310.2	3	3	1	1006	2079	100	Dynamin like protein
Solyc01g005320.2	5	1	0	1	2	0	Conserved membrane protein
Solyc01g005330.2	646	746	731	313	282	108	microtubule associated protein Type 1
Solyc01g005340.2	56	77	74	54	63	29	Ankyrin repeat family protein
Solyc01g005350.2	14	11	29	18	34	19	S-adenosyl-L-methionine salicylic acid carboxyl methyltransferase
Solyc01g005360.2	3	1	7	1110	1087	4	S-adenosyl-L-methionine salicylic acid carboxyl methyltransferase
Solyc01g005370.2	8	28	12	32	44	23	Calmodulin-2
Solyc01g005380.2	67	87	85	36	39	8	SET domain containing protein
Solyc01g005390.2	2	2	5	6	5	22	Nudix hydrolase 4
Solyc01g005400.2	27	31	47	46	61	18	Calcium binding protein Caleosin
Solyc01g005410.2	11	14	11	29	28	13	Calcium binding protein Caleosin
Solyc01g005420.2	7	11	20	11	18	4	SRC2-like protein
Solyc01g005430.2	85	64	87	364	1087	1203	UBX domain protein 6
Solyc01g005440.2	994	1561	3365	2847	2961	449	Jasmonate ZIM-domain protein 3
Solyc01g005450.2	33	45	32	28	25	20	F-box protein family-like protein
Solyc01g005460.2	105	116	92	43	34	8	Dynein light chain 1 cytoplasmic
Solyc01g005470.2	17	39	94	55	57	36	Cell number regulator 10
Solyc01g005480.2	67	71	96	53	39	10	Unknown Protein
Solyc01g005490.2	106	115	148	176	180	59	Iaa-amino acid hydrolase 4
Solyc01g005500.2	2	1	2	1	3	1	3-phenylpropionate-dihydrodiol/cinnamic acid-dihydrodiol dehydrogenase
Solyc01g005510.2	81	171	527	31293	60649	59118	Laccase-2
Solyc01g005520.2	442	448	336	180	143	96	Tetratricopeptide TPR_2 repeat protein
Solyc01g005530.2	47	76	99	26	45	21	Genomic DNA chromosome 3 P1 clone MRP15
Solyc01g005540.2	153	187	175	90	89	40	Lysyl-tRNA synthetase
Solyc01g005550.2	1026	1065	894	505	481	230	Carboxyl-terminal peptidase
Solyc01g005560.2	739	783	1356	1566	1613	731	Isocitrate dehydrogenase
Solyc01g005570.2	186	158	131	163	136	51	Unknown Protein
Solyc01g005580.2	302	283	257	243	199	90	Unknown Protein
Solyc01g005590.2	156	207	239	132	157	111	Unknown Protein
Solyc01g005600.2	226	218	286	230	387	165	Adenosine 5%26apos-phosphosulfate reductase 8
Solyc01g005610.2	0	0	1	2	3	15	GDSL esterase/lipase At1g09390
Solyc01g005620.2	1643	2030	2608	2311	1785	549	Mitochondrial 2-oxoglutarate/malate carrier protein
Solyc01g005630.1	0	1	4	0	0	0	Ethylene responsive transcription factor 2a
Solyc01g005640.2	136	156	141	106	99	54	Uncharacterized plant-specific domain TIGR01589 family protein
Solyc01g005650.1	13	71	55	6	0	0	Ariadne-like ubiquitin ligase
Solyc01g005660.1	0	2	0	0	2	6	Myb transcription factor
Solyc01g005670.2	41	62	52	36	26	10	Disease resistance protein
Solyc01g005680.2	1	4	0	1	0	2	Cytokinin riboside 5%26apos%3B-monophosphate phosphoribohydrolase LOG
Solyc01g005690.2	169	205	272	276	231	80	Unknown Protein
Solyc01g005700.2	138	147	152	78	74	35	Mutator-like transposase-like protein
Solyc01g005710.2	14	32	66	25	15	7
Solyc01g005720.2	83	179	357	193	132	67
Solyc01g005730.2	109	223	277	179	133	114
Solyc01g005740.2	1	3	0	9	12	3	Unknown Protein
Solyc01g005750.1	54	67	76	24	37	8	Lipoxygenase
Solyc01g005760.2	137	261	388	290	208	228
Solyc01g005770.2	9	7	6	4	2	0	Unknown Protein
Solyc01g005780.1	21	53	71	39	25	15
Solyc01g005790.1	46	41	41	32	26	11	Pentatricopeptide repeat-containing protein
Solyc01g005800.2	11	6	20	7	45	11	Calmodulin binding protein
Solyc01g005810.2	297	408	366	184	158	82	Mak16 protein
Solyc01g005820.2	977	925	828	529	399	231	Splicing factor arginine/serine-rich 4
Solyc01g005830.2	214	222	198	74	63	15	Glucan endo-1 3-beta-glucosidase 4
Solyc01g005840.2	70	75	73	44	47	25	Ubiquitin-conjugating enzyme E2 E3
Solyc01g005850.1	5	6	6	4	1	0	Extensin-like protein Dif54
Solyc01g005860.2	0	1	3	3	0	1	Unknown Protein
Solyc01g005870.1	180	452	826	367	262	75
Solyc01g005880.1	2	2	8	5	9	2	Extensin-like protein Dif10 (Fragment)
Solyc01g005890.1	0	0	0	1	0	0	Unknown Protein
Solyc01g005900.2	24	18	23	43	63	12	Transferase family protein
Solyc01g005910.2	99	105	99	117	86	43	Acid phosphatase/vanadium-dependent haloperoxidase related
Solyc01g005920.2	28	22	33	41	53	14	Amino acid permease (Fragment)
Solyc01g005930.2	39	45	67	35	47	22	Unknown Protein
Solyc01g005950.2	342	425	562	509	561	193	Serine/threonine-protein phosphatase
Solyc01g005960.2	334	467	562	284	376	878	ATP dependent RNA helicase
Solyc01g005970.2	56	100	164	56	52	13	Kelch-like protein 3
Solyc01g005980.2	74	97	143	51	65	13	POT family domain containing protein expressed
Solyc01g005990.2	441	632	676	442	488	87	Non-specific lipid-transfer protein
Solyc01g006000.2	105	155	158	139	106	36	GPI mannosyltransferase 2
Solyc01g006010.2	85	91	123	70	32	22	Branchpoint-bridging protein
Solyc01g006020.2	105	150	141	102	87	24	At3g32930-like protein (Fragment)
Solyc01g006030.2	65	82	88	71	51	32	E3 ubiquitin-protein ligase bre1
Solyc01g006040.2	66	88	92	109	81	27	E3 ubiquitin-protein ligase BRE1-like 2
Solyc01g006050.2	5	6	4	5	13	227	Plant viral-response family protein
Solyc01g006060.2	0	1	0	2	0	6	Disease resistance response protein
Solyc01g006070.2	0	195	3	2	7	1	Plant viral-response family protein
Solyc01g006080.1	0	1	0	1	0	0	Protein involved in mRNA turnover and stability (ISS)
Solyc01g006090.2	67	218	117	27	14	11	rRNA processing protein Ebp2
Solyc01g006100.2	295	216	269	66	40	13	Cytosine-specific methyltransferase
Solyc01g006110.2	249	310	323	365	449	149	PP2A regulatory subunit TAP46
Solyc01g006120.2	852	935	882	851	907	445	Casein kinase-like protein
Solyc01g006130.2	232	300	214	121	71	40	Homology to unknown gene
Solyc01g006140.2	133	173	111	52	32	31	DNA replication factor Cdt1
Solyc01g006150.2	185	180	147	95	89	75	Cation-efflux pump fieF
Solyc01g006160.2	801	994	1056	600	556	212	Unknown Protein
Solyc01g006170.2	106	288	148	40	18	8	rRNA processing protein ebna1-binding protein-related
Solyc01g006180.2	50	71	114	39	40	5	GTP-binding protein-like
Solyc01g006190.2	332	393	321	217	293	236	E3 ubiquitin-protein ligase sina
Solyc01g006200.2	33	45	73	127	77	31	Unknown Protein
Solyc01g006210.2	27	46	14	13	4	7	Non-structural maintenance of chromosomes element 1 homolog
Solyc01g006220.2	47	85	88	42	24	11	Histone-lysine N-methyltransferase
Solyc01g006230.2	292	244	257	210	197	125	Cysteine protease
Solyc01g006240.2	31	35	72	21	31	10	Myrosinase-binding protein-like At3g16440
Solyc01g006250.1	5	6	10	5	0	0	Unknown Protein
Solyc01g006260.2	26	34	34	31	31	6	Ribonuclease P/MRP protein subunit POP5
Solyc01g006270.2	36	40	33	37	51	10	Unknown Protein
Solyc01g006280.2	604	746	643	443	516	218	Formate-tetrahydrofolate ligase
Solyc01g006290.2	58	142	166	82	60	16	Peroxidase
Solyc01g006300.2	21	26	46	21	26	10	Peroxidase
Solyc01g006310.2	1	0	0	0	0	0	Peroxidase
Solyc01g006320.2	159	194	165	84	87	77	Non-race specific disease resistance protein 1-like protein b
Solyc01g006330.2	104	107	48	13	1	5	PAP fibrillin family protein
Solyc01g006340.2	53	81	96	72	78	23	ATP dependent RNA helicase
Solyc01g006350.2	560	641	714	510	532	267	Glucan synthase like 7
Solyc01g006360.2	109	120	157	190	170	91	Glucan synthase like 7
Solyc01g006370.2	1294	1702	1651	1143	919	290	Glucan synthase like 3
Solyc01g006380.2	17	18	21	3	6	1	U-box domain-containing protein
Solyc01g006390.2	84	134	845	275	278	19	Cysteine-rich extensin-like protein-4
Solyc01g006400.2	3516	5702	20581	4462	4088	454	Cysteine-rich extensin-like protein-4
Solyc01g006410.2	30	61	238	48	60	6	Cysteine-rich extensin-like protein-4
Solyc01g006420.2	18	32	123	22	30	13	Unknown Protein
Solyc01g006430.2	1875	1276	1474	4154	6853	5923	Omega-6 fatty acid desaturase
Solyc01g006440.1	21	216	1238	103	839	0	Peptide transporter-like protein
Solyc01g006450.2	387	514	467	392	305	48	Enoyl reductase
Solyc01g006460.1	0	2	4	2	2	0	Non-structural maintenance of chromosome element 4
Solyc01g006480.2	57	75	119	56	55	23	Alpha/beta hydrolase
Solyc01g006490.2	41	50	118	118	69	21	Protein YdiU
Solyc01g006500.2	74	100	93	72	38	45	Pentatricopeptide repeat-containing protein
Solyc01g006510.2	254	322	312	409	465	138	L-threonine 3-dehydrogenase
Solyc01g006520.2	34	36	31	13	16	26	Receptor-like protein kinase
Solyc01g006540.2	382	476	496	451	417	207	Lipoxygenase
Solyc01g006550.2	52	96	113	92	62	63
Solyc01g006560.2	688	841	1011	552	497	119	Lipoxygenase
Solyc01g006570.1	4	2	5	3	7	1	Lipoxygenase
Solyc01g006580.2	9	11	12	6	8	4	2-oxoglutarate-dependent dioxygenase
Solyc01g006590.1	0	1	1	0	0	0	Receptor-like protein kinase
Solyc01g006610.1	7	18	17	10	9	5	2-oxoglutarate-dependent dioxygenase
Solyc01g006620.2	4	0	0	1	3	2	Phosphoribosylanthranilate transferase (Fragment)
Solyc01g006630.2	170	244	296	362	345	56	Oxidoreductase family protein
Solyc01g006640.1	0	0	0	1	0	0	AMP-dependent synthetase and ligase
Solyc01g006650.1	11	16	62	35	27	18	Ethylene insensitive 3 class transcription factor
Solyc01g006660.1	22	37	57	28	26	14	Subtilisin-like serine protease
Solyc01g006670.2	8	13	21	8	6	5	UDP-glucosyltransferase HvUGT5876
Solyc01g006680.2	114	119	140	66	78	34	Transcription factor jumonji jmjC domain protein
Solyc01g006690.2	173	178	170	150	119	79	Unknown Protein
Solyc01g006700.2	223	228	200	160	163	80	Downstream neighbor of SON
Solyc01g006710.2	145	213	235	182	107	55	ATP-dependent RNA helicase A-like protein
Solyc01g006720.2	121	167	219	208	191	164	ABC transporter G family member 22
Solyc01g006730.2	5	15	45	123	285	1133	Calcium dependent protein kinase 2
Solyc01g006740.2	34	39	60	33	31	9	Sucrose phosphate phosphatase
Solyc01g006750.2	19	25	13	670	3785	6747	Unknown Protein
Solyc01g006760.2	0	7	3	0	1	1532	Unknown Protein
Solyc01g006780.2	23	15	35	94	255	509	Unknown Protein
Solyc01g006790.2	31	26	55	187	399	765	Unknown Protein
Solyc01g006800.2	310	394	486	347	271	127	Methionine aminopeptidase
Solyc01g006810.2	108	134	196	164	236	165	RING-H2 zinc finger protein (Fragment)
Solyc01g006820.2	219	277	399	349	315	82	Unknown Protein
Solyc01g006830.2	321	331	391	184	181	79	Os02g0200800 protein (Fragment)
Solyc01g006840.2	1	4	7	3	4	0	Calcium dependent protein kinase 26
Solyc01g006850.1	14	21	16	4	6	15	Pentatricopeptide repeat-containing protein
Solyc01g006860.2	99	103	141	104	70	26	Co-chaperone HscB-like protein
Solyc01g006870.2	152	179	331	254	241	252	cDNA clone J023119C16 full insert sequence
Solyc01g006880.2	163	265	279	236	163	124	Histone-lysine N-methyltransferase
Solyc01g006890.2	280	212	261	165	219	152	Genomic DNA chromosome 5 P1 clone MUK11
Solyc01g006900.2	1809	2316	2728	1383	1278	452	Phosphatidylglycerol/phosphatidylinositol transfer protein
Solyc01g006910.2	3	4	3	1	1	0	Ring finger protein
Solyc01g006920.2	10	16	17	5	4	3	Pentatricopeptide repeat-containing protein
Solyc01g006930.2	39	45	37	37	47	21	Nuclear transcription factor Y subunit A-2
Solyc01g006940.2	309	355	289	148	162	47	Poly(U)-binding-splicing factor PUF60
Solyc01g006950.2	0	7	3	2	4	2	Syntaxin
Solyc01g006960.2	161	256	344	421	390	107	Transport protein particle subunit trs85-2
Solyc01g006970.2	176	198	259	211	174	78	ATP-dependent RNA helicase A-like protein
Solyc01g006980.2	432	454	517	448	411	59	Malonyl CoA-acyl carrier protein transacylase containing protein expressed
Solyc01g006990.2	135	96	202	184	172	78	F-box family protein
Solyc01g007000.2	0	2	2	0	0	0	U-box domain-containing protein
Solyc01g007010.2	0	2	3	0	2	0	U-box domain-containing protein
Solyc01g007020.2	3	5	2	0	0	0	U-box domain-containing protein
Solyc01g007030.2	0	2	2	0	1	0	U-box domain-containing protein
Solyc01g007040.2	0	1	1	0	0	0	U-box domain-containing protein
Solyc01g007060.2	107	147	131	78	57	12	At5g63850 (Fragment)
Solyc01g007070.2	224	301	300	323	342	323	BEL1-like homeodomain protein 1
Solyc01g007080.2	13	12	6	5	10	11	Aluminum-activated malate transporter (Fragment)
Solyc01g007100.2	277	333	266	191	161	128	Digalactosyldiacylglycerol synthase 1%2C chloroplastic
Solyc01g007110.2	164	176	176	186	434	901	NC domain-containing protein
Solyc01g007120.2	146	202	200	106	86	45	Serine/threonine protein kinase
Solyc01g007130.2	167	254	174	106	93	48
Solyc01g007140.2	39	78	109	37	100	84	Pre-rRNA-processing protein ipi1
Solyc01g007150.2	419	618	759	773	907	195	Coatomer subunit beta-1
Solyc01g007160.2	15	17	7	5	1	0	N-acetyltransferase ESCO1
Solyc01g007170.2	61	58	32	5	9	1	Protein unc-13 homolog C
Solyc01g007180.2	12	32	39	50	38	33	Unknown Protein
Solyc01g007190.2	21	136	38	40	38	29	Unknown Protein
Solyc01g007200.2	120	126	132	52	63	19	Unknown Protein
Solyc01g007210.2	0	0	0	0	101	556	Unknown Protein
Solyc01g007220.2	52	83	456	407	453	156	NHL1 (Fragment)
Solyc01g007230.2	195	151	117	71	48	15	Harpin-induced protein-like (Fragment)
Solyc01g007240.2	0	3	2	0	117	1705	NHL3 (Fragment)
Solyc01g007250.2	108	236	207	94	53	41	U3 small nucleolar ribonucleoprotein protein IMP4
Solyc01g007260.2	36	42	51	27	19	14	Os04g0416500 protein (Fragment)
Solyc01g007270.1	10	0	0	0	1	0	Cytokinin riboside 5%26apos%3B-monophosphate phosphoribohydrolase LOG
Solyc01g007280.2	25	27	10	6	6	1	30S ribosomal protein S4 chloroplastic
Solyc01g007290.1	20	20	9	44	32	2	NAD(P)H-quinone oxidoreductase subunit J
Solyc01g007300.1	25	33	8	21	9	5	NAD(P)H-quinone oxidoreductase subunit K chloroplastic
Solyc01g007310.2	19	18	9	6	1	11	NAD(P)H-quinone oxidoreductase subunit 3
Solyc01g007320.2	1081	1642	773	358	183	164	ATP synthase subunit beta chloroplastic
Solyc01g007330.2	1921	2263	698	898	260	533	Ribulose bisphosphate carboxylase large chain
Solyc01g007340.2	45	40	20	48	4	10	Acetyl-coenzyme A carboxylase carboxyl transferase subunit beta
Solyc01g007350.2	40	39	15	25	7	8	Photosystem I reaction center subunit VIII
Solyc01g007360.2	25	24	16	9	8	10	Photosystem I assembly protein ycf4
Solyc01g007370.2	41	59	12	18	5	15	Chloroplast envelope membrane protein A
Solyc01g007380.1	33	51	10	22	8	12	Apocytochrome f
Solyc01g007390.1	15	18	8	5	3	2	Unknown Protein
Solyc01g007400.1	49	62	31	37	7	15	Unknown Protein
Solyc01g007410.2	76	95	47	28	20	9	Cytochrome b559 subunit alpha
Solyc01g007420.2	5	13	2	7	2	4	Cytochrome b6-f complex subunit 6
Solyc01g007430.2	12	16	6	5	3	3	Cytochrome b6-f complex subunit 5
Solyc01g007440.1	41	38	17	11	7	16	Photosystem I reaction center subunit IX
Solyc01g007450.1	10	8	5	3	1	1	50S ribosomal protein L33 chloroplastic
Solyc01g007460.2	27	23	12	9	4	2	30S ribosomal protein S18 chloroplastic
Solyc01g007470.1	17	14	6	7	0	3	50S ribosomal protein L20 chloroplastic
Solyc01g007480.1	12	17	9	5	4	5	Ribosomal protein S12 (Fragment)
Solyc01g007490.2	87	81	60	18	21	23	ATP-dependent Clp protease proteolytic subunit
Solyc01g007500.2	349	371	108	130	40	96	Photosystem II CP47 chlorophyll apoprotein
Solyc01g007510.1	29	32	7	7	5	6	PsbN
Solyc01g007520.2	76	95	24	32	12	22	Photosystem II reaction center protein H
Solyc01g007530.2	152	172	51	64	13	48	Cytochrome b6
Solyc01g007540.2	49	57	12	17	3	14	Cytochrome b6-f complex subunit 4
Solyc01g007550.1	3	10	3	4	0	3	DNA-directed RNA polymerase subunit alpha
Solyc01g007560.2	28	32	11	8	2	15	DNA-directed RNA polymerase subunit alpha
Solyc01g007570.2	52	59	18	24	4	16	30S ribosomal protein S11 chloroplastic
Solyc01g007580.2	53	67	18	32	9	9	30S ribosomal protein S8
Solyc01g007590.2	42	56	17	21	8	9	50S ribosomal protein L14 chloroplastic
Solyc01g007600.2	44	66	22	26	6	11	50S ribosomal protein L16 chloroplastic
Solyc01g007610.2	109	97	66	52	19	27	30S ribosomal protein S3 chloroplastic
Solyc01g007620.2	15	17	11	6	4	6	30S ribosomal protein S19 chloroplastic
Solyc01g007630.2	104	122	70	51	34	30	50S ribosomal protein L2 chloroplastic
Solyc01g007640.2	125	127	70	81	33	44	Ycf2
Solyc01g007650.2	19	21	13	6	3	3	Ycf15
Solyc01g007660.2	212	268	199	132	110	100	NAD(P)H-quinone oxidoreductase subunit 2 chloroplastic
Solyc01g007670.2	260	293	266	137	156	101	30S ribosomal protein S7 chloroplastic
Solyc01g007680.1	4	2	3	1	1	1	Orf146 protein
Solyc01g007690.2	25498	28748	8680	12418	3504	8860	Unknown Protein
Solyc01g007700.2	27804	31351	9449	13516	3796	9570	Conserved protein
Solyc01g007710.2	12015	13504	3807	5325	1447	3630	Unknown Protein
Solyc01g007720.2	2846	3128	811	1102	291	644	ORF42f
Solyc01g007730.2	7585	8223	2519	3282	941	2057	ORF91
Solyc01g007740.2	387	413	390	278	306	117	Peroxiredoxin
Solyc01g007750.2	64	68	70	27	20	12	Mitochondrial transcription termination factor (Fragment)
Solyc01g007760.2	76	164	101	58	42	27	Transcription factor E2F
Solyc01g007770.2	13	26	13	18	17	24	Genomic DNA chromosome 5 P1 clone MHF15
Solyc01g007780.2	18	27	19	11	18	12	Receptor expression-enhancing protein 3
Solyc01g007790.2	242	69	104	110	88	28	UPF0554 protein C2orf43 homolog
Solyc01g007800.2	44	35	20	9	3	0	Plant-specific domain TIGR01568 family protein
Solyc01g007810.1	62	66	48	39	22	2	Plant-specific domain TIGR01568 family protein
Solyc01g007820.1	7	1	4	8	4	3	Unknown Protein
Solyc01g007830.1	1	3	2	4	2	2	Unknown Protein
Solyc01g007840.2	79	149	164	186	173	48	CCR4-NOT transcription complex subunit 7
Solyc01g007850.2	78	138	169	108	71	34	Pentatricopeptide repeat-containing protein
Solyc01g007860.2	893	790	865	729	639	245	Ubiquitin-conjugating enzyme family protein-like
Solyc01g007870.2	43	72	102	20	13	2	Cyclin B-like protein
Solyc01g007880.2	47	57	72	34	30	15	MORN repeat protein
Solyc01g007890.1	95	109	74	26	15	11	Unknown Protein
Solyc01g007900.2	96	94	107	72	161	126	Tobamovirus multiplication protein (Fragment)
Solyc01g007910.2	215	336	513	811	942	156	Succinyl-CoA ligase
Solyc01g007920.2	34	45	70	64	94	44	Isochorismatase family protein
Solyc01g007930.2	74	95	71	44	56	29	Sel1 domain protein repeat-containing protein
Solyc01g007940.2	18	16	8	15	10	4	Alanine aminotransferase 2
Solyc01g007950.2	84	734	201	265	4954	10305	Peroxidase 1
Solyc01g007960.2	0	3	3	4	4	5
Solyc01g007970.1	2	4	0	3	4	3
Solyc01g007980.2	2	3	3	3	6	2
Solyc01g007990.2	45	64	47	35	23	43
Solyc01g008000.2	767	782	998	880	1284	739	ADP-ribosylation factor
Solyc01g008010.2	112	132	155	180	359	400	Os09g0327550 protein (Fragment)
Solyc01g008020.2	180	217	237	250	316	98	Equilibrative nucleoside transporter 1
Solyc01g008030.2	0	0	0	0	2	0	Unknown Protein
Solyc01g008040.1	0	0	0	10	51	18	S-locus F-box-like protein a (Fragment)
Solyc01g008050.2	4	8	58	445	1195	717	Leaf senescence protein-like
Solyc01g008060.2	297	405	413	252	249	106	Phosphoglycerate mutase
Solyc01g008070.2	87	273	153	110	155	105	Alpha/beta superfamily hydrolase
Solyc01g008080.2	1505	1977	1883	963	675	345	Ribosomal protein S27
Solyc01g008090.2	910	1184	1079	581	372	190	Ribosomal protein S27
Solyc01g008100.2	659	381	398	236	207	60	Transferase transferring glycosyl groups
Solyc01g008110.2	3336	3494	3797	1442	1064	250
Solyc01g008120.2	407	455	544	401	424	204	Histone acetyltransferase
Solyc01g008130.2	37	16	51	19	32	59	DEP domain-containing protein 1B
Solyc01g008140.2	164	220	167	130	132	73	Receptor kinase
Solyc01g008150.1	2	1	0	0	0	0	Unknown Protein
Solyc01g008160.2	124	185	184	87	59	27	Tetratricopeptide repeat-containing protein
Solyc01g008170.2	286	319	391	236	174	135	Zinc finger CCCH domain-containing protein 17
Solyc01g008180.2	239	326	181	88	71	32	DNA-binding protein (Fragment)
Solyc01g008190.2	31	31	32	27	19	13	Os05g0304100 protein (Fragment)
Solyc01g008200.2	28	33	37	35	29	15	Os05g0304100 protein (Fragment)
Solyc01g008210.2	16	43	127	58	35	6	Unknown Protein
Solyc01g008220.2	6	20	52	28	18	4	Arabinogalactan protein
Solyc01g008230.2	434	456	415	231	212	74	TCP family transcription factor
Solyc01g008240.2	39	82	74	11415	27906	30272	Solute carrier family 2%2C facilitated glucose transporter member 3
Solyc01g008250.2	241	336	226	102	114	71	Thioredoxin X
Solyc01g008260.2	66	85	80	67	52	12	E2F-associated phosphoprotein
Solyc01g008270.2	178	168	240	161	87	31	Prefoldin subunit 5
Solyc01g008280.2	116	148	201	223	172	72	Serine/threonine-protein phosphatase 2A activator 2
Solyc01g008290.2	50	96	160	86	46	14	Dihydroorotate dehydrogenase
Solyc01g008300.1	15	4	5	4	3	0	Hydroxycinnamoyl CoA shikimate/quinate hydroxycinnamoyltransferase-like protein
Solyc01g008310.2	412	505	576	464	432	196	Phenylalanyl-tRNA synthetase beta chain
Solyc01g008320.2	117	172	234	143	147	107	DDHD domain containing 1
Solyc01g008330.2	1327	443	787	1087	804	95	Acetyl-CoA carboxylase biotin carboxylase
Solyc01g008340.2	103	136	210	155	43	17	50S ribosomal protein L19
Solyc01g008350.2	183	244	246	122	137	63	DNAJ heat shock N-terminal domain-containing protein-like
Solyc01g008360.2	189	259	254	127	144	65	Pre-mRNA branch site p14-like protein
Solyc01g008370.2	703	888	921	624	615	233	26S proteasome regulatory subunit
Solyc01g008380.1	3	4	5	0	1	0	Pentatricopeptide repeat-containing protein
Solyc01g008390.1	13	30	29	22	14	50
Solyc01g008400.2	3	11	38	8	26	23	Unknown Protein
Solyc01g008410.1	13	27	24	11	6	21
Solyc01g008420.2	13	13	47	8	43	212	Mate efflux family protein
Solyc01g008430.1	0	0	0	0	1	0	Unknown Protein
Solyc01g008440.2	88	121	275	652	1201	2326	Calcium-dependent protein kinase 8
Solyc01g008450.1	2	0	0	0	0	0	Unknown Protein
Solyc01g008460.2	73	99	153	126	88	32	2Fe-2S ferredoxin
Solyc01g008470.2	106	171	203	168	217	58	Non-selective cation channel-2 family
Solyc01g008480.2	36	47	59	63	51	21	Pentatricopeptide repeat-containing protein
Solyc01g008490.2	39	70	90	48	45	20	Nuclear transcription factor Y subunit A-1
Solyc01g008500.2	1	4	3	3	3	4	Receptor serine/threonine kinase
Solyc01g008520.2	14	15	26	10	7	3	DNA repair protein XRCC2
Solyc01g008530.2	374	120	217	478	1259	71	Cinnamoyl CoA reductase-like protein
Solyc01g008540.2	3	4	7	4	8	3	Cinnamoyl CoA reductase-like protein
Solyc01g008550.2	765	762	940	903	875	268	Cinnamoyl CoA reductase-like protein
Solyc01g008560.2	154	140	150	119	109	78	NAD kinase 1
Solyc01g008570.1	2	2	4	3	10	10	Receptor-like protein kinase
Solyc01g008590.1	0	0	0	0	3	0	Zinc transporter protein
Solyc01g008600.2	651	494	498	68	28	8	Zinc finger CCCH domain-containing protein 53
Solyc01g008610.2	1	0	1	46	224	185	Beta-1 3-glucanase
Solyc01g008620.2	28	19	8	10	23	36	Beta-1 3-glucanase
Solyc01g008640.2	2	1	1	3	1	1
Solyc01g008650.2	2	2	2	1	1	0
Solyc01g008660.2	41	41	42	41	9	6	F-box family protein
Solyc01g008670.2	100	87	103	167	184	79
Solyc01g008680.2	9	4	5	143	248	140	S2 self-incompatibility locus-linked pollen 3.2 protein
Solyc01g008690.2	2	2	0	1	3	0	GDP-mannose transporter
Solyc01g008700.2	98	127	120	65	60	19	cDNA clone 001-102-C05 full insert sequence
Solyc01g008720.1	0	0	0	1	0	0	Mannan endo-1 4-beta-mannosidase
Solyc01g008730.2	221	108	93	62	78	45	BZIP transcription factor
Solyc01g008740.1	0	1	0	89	332	107	Calcium-dependent protein kinase 17
Solyc01g008750.1	0	1	2	3	1	1	cDNA clone J013074B07 full insert sequence
Solyc01g008760.2	27	36	55	21	27	5	Genomic DNA chromosome 5 P1 clone MUB3
Solyc01g008770.2	349	433	473	294	254	124	Rho GTPase activating protein 12
Solyc01g008780.2	193	216	233	163	122	86	Phospholipase A22
Solyc01g008790.2	84	137	396	65	71	12	Phosphoesterase family protein
Solyc01g008800.1	63	73	117	40	32	13
Solyc01g008810.2	338	117	107	63	112	91	Zinc finger family protein
Solyc01g008820.2	212	365	499	391	415	117	Signal peptide peptidase family protein
Solyc01g008830.1	29	39	39	15	20	13	L-ascorbate oxidase
Solyc01g008840.2	238	272	287	310	351	135	COP9 signalosome complex subunit 2
Solyc01g008850.2	173	453	506	329	282	239	CBL-interacting protein kinase 18
Solyc01g008870.1	2	2	0	0	0	0	ATP binding / serine-threonine kinase
Solyc01g008880.1	0	0	2	1	0	0	Ethylene responsive transcription factor 1b
Solyc01g008890.2	115	160	159	84	62	49	Ethylene responsive transcription factor 2a
Solyc01g008900.2	28	36	49	25	16	8	Genomic DNA chromosome 3 P1 clone MJL14
Solyc01g008910.2	80	94	74	30	15	19	Scarecrow transcription factor family protein
Solyc01g008920.2	48	58	36	18	13	20	NAD dependent epimerase/dehydratase family protein expressed
Solyc01g008930.2	220	180	127	58	24	24	Phycoerythrobilin ferredoxin oxidoreductase
Solyc01g008940.2	2	3	12	1	0	1	Anther protein
Solyc01g008950.2	1560	1540	1734	1490	2256	1521	Calmodulin 5/6/7/8-like protein
Solyc01g008960.2	2918	3838	4475	2447	2000	744	Argonaute 4-like protein
Solyc01g008970.2	1512	1913	1851	1020	913	441	Heterogeneous nuclear ribonucleoprotein A3-like protein 2
Solyc01g008980.2	29	46	48	42	44	16	BZIP transcription factor
Solyc01g008990.2	106	141	157	178	254	135	THO complex subunit 7 homolog
Solyc01g009000.2	160	164	171	97	98	44	RING finger protein 6
Solyc01g009010.2	311	403	495	428	413	267	4-diphosphocytidyl-2-C-methyl-D-erythritol kinase
Solyc01g009020.2	355	546	818	758	870	386	Cysteine proteinase inhibitor
Solyc01g009030.2	128	180	162	145	103	31	Nuclear control of ATPase protein
Solyc01g009040.2	438	305	103	28	15	3	Cyclin B1
Solyc01g009050.2	290	206	290	138	165	67	Molybdenum cofactor biosynthesis protein
Solyc01g009060.2	189	256	248	220	302	262	BTB/POZ domain containing protein expressed
Solyc01g009070.2	96	134	406	257	221	90	MYB transcription factor
Solyc01g009080.2	240	286	239	117	90	74	FHA domain containing protein
Solyc01g009090.2	513	537	523	404	376	155	Serrate RNA effector molecule homolog
Solyc01g009100.2	871	1184	1122	714	425	152	Ribosomal protein L30
Solyc01g009110.2	46	48	76	32	34	22	Histone deacetylase family protein expressed
Solyc01g009120.2	8	16	18	13	12	6	Histone deacetylase family protein expressed
Solyc01g009140.1	0	0	1	0	0	3	Dicer-like protein
Solyc01g009150.2	76	79	128	144	207	21	Glycosyl hydrolase (Fragment)
Solyc01g009160.2	17	25	21	19	12	7	Harpin-induced protein-like (Fragment)
Solyc01g009170.2	186	248	298	337	466	317	Ethylene insensitive 3 class transcription factor
Solyc01g009180.2	164	248	299	260	157	85	5-methyltetrahydropteroyltriglutamate--homocysteine methyltransferase
Solyc01g009190.1	1	2	0	2	6	0	Double-stranded RNA binding protein
Solyc01g009200.2	29	29	41	24	29	6	Restricted tev movement 2
Solyc01g009210.1	0	0	1	1	0	0	Unknown Protein
Solyc01g009220.2	16	18	22	13	13	3	Restricted tev movement 2
Solyc01g009230.2	122	131	106	54	59	30	Xanthine dehydrogenase/oxidase
Solyc01g009240.2	278	19	116	1606	6495	843	Beta-D-glucosidase
Solyc01g009250.2	10	3	7	5	35	189	Unknown Protein
Solyc01g009260.1	6	0	0	0	0	0	60S ribosomal protein L5%2C mitochondrial
Solyc01g009270.1	2	0	0	0	0	0	Unknown Protein
Solyc01g009280.2	207	228	271	201	219	116	Serine/threonine-protein phosphatase
Solyc01g009290.2	160	170	171	130	118	57	Polyribonucleotide 5%26apos%3B-hydroxyl-kinase Clp1
Solyc01g009300.2	193	184	310	240	379	342	Serine/threonine kinase
Solyc01g009310.2	238	280	260	184	185	132	Sterol reductase
Solyc01g009320.1	1	0	0	0	0	0	U-box domain-containing protein 24
Solyc01g009330.1	43	0	0	0	0	1	U-box domain-containing protein
Solyc01g009340.2	54	43	13	4	3	1	Calmodulin-binding protein family-like
Solyc01g009350.2	184	4	0	0	0	0	CCR4-NOT transcription complex subunit 7
Solyc01g009360.1	21	1	0	0	0	0	CCR4-NOT transcription complex subunit 7
Solyc01g009370.1	2	0	1	3	5	13
Solyc01g009380.2	88	95	140	144	130	37	Nicalin
Solyc01g009390.2	42	97	74	67	50	20	MRNA decapping enzyme
Solyc01g009410.2	0	1	0	0	0	0	Peroxidase 57
Solyc01g009420.2	751	900	1045	760	757	304	Bifunctional polymyxin resistance arnA protein
Solyc01g009430.2	295	356	321	300	398	608	Os02g0448600 protein (Fragment)
Solyc01g009440.1	1	0	17	5	10	0	Ethylene-responsive transcription factor 10
Solyc01g009450.2	315	363	507	555	538	213	Mitochondrial inner membrane protease ATP23
Solyc01g009460.2	8	8	15	9	5	2	Unknown Protein
Solyc01g009470.1	0	0	2	0	0	1	Poly
Solyc01g009480.2	14	3	74	1	7	778	Hydrolase alpha/beta fold family protein
Solyc01g009490.1	10	0	0	0	0	0	cDNA clone J100026I16 full insert sequence
Solyc01g009500.2	52	51	78	37	28	21	Hydrolase alpha/beta fold family protein
Solyc01g009520.2	697	1078	1257	810	502	164	Ribosomal protein
Solyc01g009530.1	1	0	0	0	0	0	Genomic DNA chromosome 3 TAC clone K7P8
Solyc01g009540.1	0	0	1	0	0	0	Genomic DNA chromosome 3 TAC clone K7P8
Solyc01g009550.1	0	1	0	2	0	0	Hypothetical chloroplast RF1
Solyc01g009560.1	0	0	3	2	0	0	Terminal flower 1 (Fragment)
Solyc01g009570.2	75	70	99	33	23	12	Unknown Protein
Solyc01g009580.1	1	0	1	3	1	0	Terminal flower 1 (Fragment)
Solyc01g009590.2	15066	157	18	3	8	5	A9-like protein (Fragment)
Solyc01g009600.2	2	7	756	5	907	947	Dehydration-responsive family protein
Solyc01g009610.2	89	116	111	75	67	24	Unknown Protein
Solyc01g009620.2	219	128	99	79	57	19	Cleavage and polyadenylation specificity factor subunit 5
Solyc01g009630.2	291	172	207	135	108	33	Cleavage and polyadenylation specificity factor subunit 5
Solyc01g009640.1	0	0	2	0	0	0	Polygalacturonase
Solyc01g009670.2	27	28	8	6	6	2	CCA-adding enzyme
Solyc01g009680.2	285	397	434	227	229	56	Lipoxygenase
Solyc01g009690.1	61	104	110	97	62	56
Solyc01g009700.1	30	63	85	52	24	40
Solyc01g009710.1	0	1	0	0	0	0	Unknown Protein
Solyc01g009720.1	6	3	3	5	3	3	Zinc finger family protein
Solyc01g009730.1	2618	3113	964	1412	393	997	Unknow protein
Solyc01g009740.1	4	0	0	2	8	25	Unknown Protein
Solyc01g009750.2	384	439	420	342	332	152	Unknown Protein
Solyc01g009760.2	9	14	19	6	9	6	GRAM-containing/ABA-responsive protein (Fragment)
Solyc01g009770.2	102	84	49	16	10	7	Major ampullate spidroin 2-2
Solyc01g009780.2	83	129	187	129	165	107	LITAF-domain-containing protein
Solyc01g009800.1	0	0	2	1	0	0	Mutator-like transposase 53847-56139
Solyc01g009810.2	9	6	22	29	15	8
Solyc01g009820.2	100	118	145	127	139	95	Hydroxyproline-rich glycoprotein family protein
Solyc01g009830.2	4	8	10	12	14	3	UDP-glucuronic acid/UDP-N-acetylgalactosamine transporter
Solyc01g009840.1	2	3	2	1	0	0	GAI-like protein 1 (Fragment)
Solyc01g009850.2	234	264	304	190	129	69	Unknown Protein
Solyc01g009860.2	83	80	131	216	186	251	NAC domain transcription factor
Solyc01g009870.2	4	6	7	43	531	148	Glycerophosphodiester phosphodiesterase GDE1
Solyc01g009880.2	0	0	0	0	34	14	Exocyst complex protein EXO70
Solyc01g009890.1	0	2	5	1	1	0	Glutaredoxin
Solyc01g009900.2	1	2	6	1	2	2	Glutaredoxin
Solyc01g009910.1	2	1	2	0	0	0	Glutaredoxin
Solyc01g009920.1	14	48	87	42	26	10	MORC family CW-type zinc finger 3
Solyc01g009930.1	4	7	6	5	6	2
Solyc01g009950.1	1	0	1	1	0	0	Polyprotein-like related
Solyc01g009960.2	0	1	2	1	3	1	Stearoyl-acyl-carrier protein desaturase
Solyc01g009970.2	113	173	196	97	98	37	Amidohydrolase 2
Solyc01g009980.1	0	0	1	0	0	0	Retrotransposon like protein
Solyc01g009990.2	1196	1167	1060	514	440	203	Peptidyl-prolyl cis-trans isomerase
Solyc01g010000.2	86	69	72	65	34	21	ACT domain-containing protein
Solyc01g010010.1	2	0	21	4	4	11	Mutator-like transposase
Solyc01g010020.2	36	32	30	55	152	72	Calmodulin
Solyc01g010030.2	115	136	115	63	37	21	Receptor-like protein kinase At3g21340
Solyc01g010040.2	798	908	879	576	629	348	S-adenosylmethionine decarboxylase uORF
Solyc01g010050.2	797	908	879	576	629	348	S-adenosylmethionine decarboxylase proenzyme
Solyc01g010060.2	14	22	13	11	6	15	Unknown Protein
Solyc01g010070.1	0	0	0	1	0	0	Unknown Protein
Solyc01g010080.2	6	4	2	1	0	0	Potassium/sodium hyperpolarization-activated cyclic nucleotide-gated channel 4
Solyc01g010090.1	0	0	3	1	1	0	Unknown Protein
Solyc01g010110.1	1	0	0	0	0	0	Mutator-like transposase
Solyc01g010130.2	211	151	163	133	186	127	Transcription factor
Solyc01g010140.1	0	0	0	1	0	0	Unknown Protein
Solyc01g010150.2	153	167	256	127	140	205	Unknown protein DS12 from 2D-PAGE of leaf%2C chloroplastic
Solyc01g010160.2	7	168	6	3	5	5	Beta-glucosidase
Solyc01g010180.2	101	89	67	30	19	59	Unknown Protein
Solyc01g010190.2	91	96	75	43	35	32	Unknown Protein
Solyc01g010200.2	639	635	503	296	315	245	LTRGag-pol-polymerase 3
Solyc01g010210.1	0	0	1	0	0	0	Unknown Protein
Solyc01g010220.2	126	106	94	76	81	53	Unknown Protein
Solyc01g010230.2	83	117	76	76	66	43	Unknown Protein
Solyc01g010240.2	28	11	1	1	2	0	CRABS CLAW (Fragment)
Solyc01g010250.2	119	118	107	23	34	32	6-phosphogluconolactonase
Solyc01g010260.2	1	2	0	1	0	0
Solyc01g010270.2	114	131	127	201	239	43	Nitrilase associated protein-like (Fragment)
Solyc01g010280.2	1	0	1	28	101	170	Unknown Protein
Solyc01g010290.2	59	77	106	75	107	149	Ureide permease 2
Solyc01g010310.2	402	307	235	109	67	33	Glucan endo-1 3-beta-glucosidase 3
Solyc01g010320.1	0	2	4	1	0	0	Mutator-like transposase
Solyc01g010330.1	0	4	2	1	1	0	Unknown Protein
Solyc01g010340.1	13	25	29	10	12	8	Serine/threonine-protein phosphatase 7 long form homolog
Solyc01g010350.2	2	10	161	18	10	0	Glucose-6-phosphate/phosphate translocator
Solyc01g010360.2	2	5	50	1927	2291	353	14-3-3-like protein GF14 epsilon
Solyc01g010370.2	85	123	164	272	374	47	Dehydration-responsive protein-like
Solyc01g010380.2	0	1	71	1	14	14	Unknown Protein
Solyc01g010390.2	90	4119	244	119	129	122	Beta-glucosidase
Solyc01g010400.1	2	2	3	1	0	0	Ripening-related protein 3
Solyc01g010410.2	5	25	79	68	24	2	Cys2/His2 zinc-finger transcription factor
Solyc01g010420.2	0	0	2	12	8	2	NPH3 domain containing protein-like
Solyc01g010430.2	131	136	209	256	242	140	cDNA clone J023121M11 full insert sequence
Solyc01g010440.2	317	400	406	279	224	94	Unknown Protein
Solyc01g010450.1	1	1	0	2	1	0	Ulp1 protease family C-terminal catalytic domain containing protein
Solyc01g010460.2	40	46	45	36	13	5	Unknown Protein
Solyc01g010470.2	40	61	43	21	6	3	Isoamylase N-terminal domain containing protein
Solyc01g010480.2	7	6	17	23	64	16	Potassium voltage-gated channel subfamily H member 8
Solyc01g010490.2	20	7	4	2	3	1
Solyc01g010500.1	0	4	140	284	214	2	Ein3-binding f-box protein 3
Solyc01g010510.2	45	39	34	18	23	7	Pentatricopeptide repeat-containing protein
Solyc01g010520.2	218	224	161	67	37	26	Uncharacterized plant-specific domain TIGR01589 family protein
Solyc01g010530.1	85	216	25	1	0	0	Solute carrier family 2%2C facilitated glucose transporter member 3
Solyc01g010540.2	1263	1800	1459	903	714	241	Ribosomal protein
Solyc01g010550.1	1	0	0	0	0	0	Unknown Protein
Solyc01g010570.2	85	99	143	78	65	38	Mucin-like protein (Fragment)
Solyc01g010580.2	1351	1883	1621	993	757	275	Ribosomal protein
Solyc01g010590.2	77	105	108	64	86	25	Peptidyl-prolyl cis-trans isomerase A
Solyc01g010600.2	4	7	16	13	9	9	Homeobox-leucine zipper-like protein
Solyc01g010610.1	0	1	6	2	1	3	Unknown Protein
Solyc01g010630.1	26	14	5	4	0	1	Ulp1 protease family C-terminal catalytic domain containing protein
Solyc01g010640.2	116	118	115	101	76	73	Uncharacterized membrane protein
Solyc01g010650.2	117	171	397	447	873	534	UDP-galactose transporter 3
Solyc01g010660.2	41	58	77	87	83	37	Receptor-like protein kinase At3g21340
Solyc01g010670.1	0	2	15	22	26	4	Unknown Protein
Solyc01g010680.1	1	0	1	3	5	0	Genomic DNA chromosome 5 P1 clone MRD20
Solyc01g010690.1	1	2	0	0	0	0	Polyvinylalcohol dehydrogenase
Solyc01g010700.2	74	93	179	374	300	56	AKIN gamma
Solyc01g010710.2	52	46	38	8	4	2	Serine carboxypeptidase 1
Solyc01g010730.1	0	3	1	0	0	0	Serine carboxypeptidase
Solyc01g010740.2	0	26	2	4	289	642	Pectate lyase family protein
Solyc01g010750.2	697	829	937	711	735	353	Stress responsive protein
Solyc01g010760.2	390	541	823	1566	1583	354	Porin/voltage-dependent anion-selective channel protein
Solyc01g010770.2	17	10	16	23	32	12	Spfh domain / band 7 family protein
Solyc01g010780.2	196	202	257	201	161	96	ATP binding / serine-threonine kinase
Solyc01g010790.1	1	27	1	1	0	0	F-box protein At2g21930
Solyc01g010800.1	1	0	0	1	4	0	Unknown Protein
Solyc01g010810.2	36	41	42	39	18	14	RAN guanine nucleotide release factor
Solyc01g010820.2	252	364	281	266	252	124	Cullin C
Solyc01g010830.2	116	119	124	120	95	30	HAD-superfamily hydrolase
Solyc01g010840.1	0	0	0	0	2	0	Unknown Protein
Solyc01g010850.1	0	0	0	1	1	1	Unknown Protein
Solyc01g010860.2	95	80	103	127	205	199	Sphingosine hydroxylase
Solyc01g010870.2	206	216	253	159	192	97	Dehydration-responsive family protein
Solyc01g010880.2	35	35	38	19	116	2182	E3 ubiquitin-protein ligase MARCH3
Solyc01g010890.2	0	3	0	0	3	179	Expansin 2
Solyc01g010900.2	5659	10	4	1	2	2
Solyc01g010910.1	21	15	30	11	4	1	MYB transcription factor
Solyc01g010920.1	19	16	23	27	22	3	Os03g0169000 protein (Fragment)
Solyc01g010930.2	20	20	21	33	35	4	Os03g0169000 protein (Fragment)
Solyc01g010940.2	147	178	183	158	180	82	Transmembrane emp24 domain-containing protein 10
Solyc01g010950.2	293	112	153	483	819	1001	Kinase family protein
Solyc01g010960.1	264	338	368	210	139	39	60S ribosomal protein L35
Solyc01g010970.2	58	39	46	15	24	17	ARGONAUTE 1
Solyc01g010980.1	0	1	0	0	0	0	Unknown Protein
Solyc01g010990.2	94	100	154	158	137	31	Unknown Protein
Solyc01g011000.2	630	1108	914	794	559	323	Eukaryotic translation initiation factor 5A
Solyc01g011010.2	12	37	38	27	23	7	Unknown Protein
Solyc01g011020.1	9	3	2	7	0	3	Unknown Protein
Solyc01g011030.2	88	92	100	507	739	395	RING zinc finger protein-like
Solyc01g011040.2	279	381	597	568	692	139
Solyc01g011050.2	39	75	58	8781	25871	28287
Solyc01g011060.1	3	2	2	0	0	12	Maturase (Fragment)
Solyc01g011080.2	31	23	36	10	13	14	Unknown Protein
Solyc01g011090.2	19	32	42	24	34	13	Phospholipid-transporting ATPase
Solyc01g011100.2	184	212	267	154	151	68	Phospholipid-transporting ATPase
Solyc01g011130.1	8	7	14	4	5	0	Ulp1 protease family C-terminal catalytic domain containing protein
Solyc01g011170.1	0	0	0	0	0	1	Unknown Protein
Solyc01g011180.1	5	3	8	9	12	1	Unknown Protein
Solyc01g011190.1	10	7	14	6	11	2	Unknown Protein
Solyc01g011200.2	5	8	4	3	5	1	Aspartyl protease family protein
Solyc01g011220.1	6	5	9	5	0	3	Aspartyl protease family protein
Solyc01g011230.2	1	2	1	0	0	0	Aspartyl protease family protein
Solyc01g011260.1	0	1	0	0	0	0	Aspartyl protease family protein
Solyc01g011270.1	0	1	2	0	0	0	Aspartyl protease family protein
Solyc01g011300.1	0	0	1	0	0	0	Aspartyl protease family protein
Solyc01g011310.1	1	2	1	0	0	0	Aspartyl protease family protein
Solyc01g011320.1	1	2	1	0	0	0	Aspartyl protease family protein
Solyc01g011330.1	1	0	4	0	0	1	Aspartyl protease family protein
Solyc01g011340.2	345	337	450	356	470	168	Serine/threonine-protein phosphatase
Solyc01g011350.2	203	241	295	262	262	91	cDNA clone J013057D02 full insert sequence
Solyc01g011370.1	0	0	0	2	2	0	Unknown Protein
Solyc01g011390.2	2	1	8	9	373	1340	Unknown Protein
Solyc01g011400.1	0	0	0	1	0	0	Unknown Protein
Solyc01g011410.1	5	5	2	4	1	0	NADH-quinone oxidoreductase subunit D
Solyc01g011420.1	30	36	87	90	47	21	Unknown Protein
Solyc01g011430.2	30	7	1	61	51	6	Diacylglycerol O-acyltransferase
Solyc01g011480.1	30	34	15	16	4	10	Photosystem II CP43 chlorophyll apoprotein
Solyc01g011490.1	5	3	3	10	11	0	O-acyltransferase WSD1
Solyc01g011500.1	0	1	0	0	0	0	Unknown Protein
Solyc01g011510.2	315	531	600	636	743	505	Aldehyde dehydrogenase
Solyc01g011520.1	0	1	0	0	0	0	Dicer-like protein
Solyc01g011540.1	1	2	7	1	0	3	Dicer-like protein
Solyc01g012580.1	0	0	0	0	1	1	Endoribonuclease Dicer homolog 2b
Solyc01g012620.1	17	3	1	1	0	0	Ulp1 protease family C-terminal catalytic domain containing protein
Solyc01g012640.1	0	0	1	0	0	0	Dicer-like protein
Solyc01g012670.1	0	1	0	0	0	0	Dicer-like protein
Solyc01g012690.1	0	8	4	0	1	1
Solyc01g012700.2	78	133	139	143	175	115	Aldehyde dehydrogenase
Solyc01g012750.1	19	25	40	41	48	28	Aldehyde dehydrogenase family protein expressed
Solyc01g012760.1	74	128	131	141	161	110	Aldehyde dehydrogenase
Solyc01g013880.1	0	2	7	3	0	1
Solyc01g013890.1	65	107	123	140	142	114	Aldehyde dehydrogenase
Solyc01g013900.2	49	91	82	93	113	74	Aldehyde dehydrogenase
Solyc01g013930.1	0	0	1	0	0	1	Dicer-like protein
Solyc01g013940.1	6	11	7	6	7	2	Dicel-like 2 (Fragment)
Solyc01g013970.1	0	2	2	0	0	0	Unknown Protein
Solyc01g014000.1	0	0	0	0	1	0	Unknown Protein
Solyc01g014020.1	1	4	2	0	2	0
Solyc01g014040.1	0	0	0	4	3	0	Unknown Protein
Solyc01g014050.1	0	1	0	0	0	0	Unknown Protein
Solyc01g014060.1	1	1	0	0	0	0	Blue copper protein
Solyc01g014070.1	5	0	0	0	0	0	Blue copper protein
Solyc01g014080.1	5	9	8	5	2	1	Gag-Pol polyprotein
Solyc01g014090.1	7	6	5	13	9	3	Plant synaptotagmin
Solyc01g014100.2	9	18	11	10	2	6	Unknown Protein
Solyc01g014110.2	15	17	23	9	4	8	Unknown Protein
Solyc01g014120.2	51	57	56	33	21	25	Unknown Protein
Solyc01g014130.1	0	1	0	1	0	1
Solyc01g014140.2	5	6	3	3	6	2	Hcr9-9D
Solyc01g014150.1	0	0	1	0	0	0
Solyc01g014160.1	7	8	9	6	5	7
Solyc01g014170.1	1	0	0	1	0	1	Hcr9-9A
Solyc01g014180.2	650	828	850	618	760	383	Zinc finger A20 and AN1 domain-containing stress-associated protein 8
Solyc01g014190.1	1	1	4	4	4	1	Unknown Protein
Solyc01g014200.1	7	8	13	10	12	1	Unknown Protein
Solyc01g014210.1	24	33	34	23	37	10	ADP ATP carrier protein-like
Solyc01g014220.1	16	14	21	39	11	1	cDNA clone J075118M20 full insert sequence
Solyc01g014230.2	87	87	106	88	91	42	U-box domain-containing protein 4
Solyc01g014240.1	0	1	0	0	1	0	TMV resistance protein N
Solyc01g014250.2	92	72	41	47	25	35	Unknown Protein
Solyc01g014270.2	58	68	74	27	32	28	Unknown Protein
Solyc01g014280.2	84	58	33	48	41	48	Unknown Protein
Solyc01g014290.1	19	7	5	7	6	2	Unknown Protein
Solyc01g014300.1	2	5	8	3	4	0	PR-protein (Fragment)
Solyc01g014310.1	2	4	7	4	3	5
Solyc01g014320.2	1	0	2	56	21	1	S-adenosyl-L-methionine salicylic acid carboxyl methyltransferase
Solyc01g014330.2	2	0	1	24	11	1	S-adenosyl-L-methionine carboxyl methyltransferase family protein
Solyc01g014340.1	0	1	0	0	0	0	Unknown Protein
Solyc01g014360.1	0	1	0	0	1	0	Unknown Protein
Solyc01g014370.1	3	0	4	3	0	3	Plant synaptotagmin integral membrane double C2 domain protein
Solyc01g014380.2	37	51	38	24	16	13	Unknown Protein
Solyc01g014390.2	0	1	0	1	1	0	Unknown Protein
Solyc01g014410.1	0	0	0	0	1	1	Dicer-like protein
Solyc01g014430.1	4	0	0	3	1	1	Dicer-like protein
Solyc01g014450.1	1	0	0	0	1	0	Dicer-like protein
Solyc01g014470.1	1	0	1	1	0	0	Unknown Protein
Solyc01g014480.2	108	127	194	152	169	82	Ethylene insensitive 3 class transcription factor
Solyc01g014490.2	132	171	181	87	60	45	Type II DNA topoisomerase VI subunit B
Solyc01g014500.1	3	1	2	3	3	0	Unknown Protein
Solyc01g014510.1	1	2	1	0	1	1	S-locus-specific glycoprotein S14 (Fragment)
Solyc01g014530.2	4	5	8	13	13	8	Receptor like kinase (Fragment)
Solyc01g014550.1	1	4	1	2	1	0	LRR receptor-like serine/threonine-protein kinase FEI 2
Solyc01g014560.2	14	21	21	11	11	5	D-mannose binding lectin family protein expressed
Solyc01g014570.1	2	0	0	1	0	0	Unknown Protein
Solyc01g014580.1	0	0	0	1	0	0	Unknown Protein
Solyc01g014620.1	3	9	4	2	1	0	Unknown Protein
Solyc01g014630.1	0	0	0	0	1	1	Unknown Protein
Solyc01g014660.1	0	2	0	0	2	1	Receptor like kinase (Fragment)
Solyc01g014680.1	1	0	0	0	0	0	CCHC-type integrase
Solyc01g014700.2	4	0	0	1	3	0	D-mannose binding lectin family protein expressed
Solyc01g014710.1	39	36	65	54	49	31	Unknown Protein
Solyc01g014720.1	0	1	3	0	0	0	Ethylene-responsive transcription factor 11
Solyc01g014730.1	8	6	11	31	20	5	Unknown Protein
Solyc01g014770.1	0	2	0	0	2	1	Ethylene receptor
Solyc01g014790.1	0	1	0	0	0	0	Dicer-like protein
Solyc01g014800.1	0	2	2	1	0	0	Dicer-like protein
Solyc01g014820.1	0	1	0	0	0	0	Inosine-uridine preferring nucleoside hydrolase family protein
Solyc01g014840.2	6	11	11	5	10	14
Solyc01g014850.2	201	165	200	116	102	54	Zinc finger CCCH domain-containing protein 14
Solyc01g014860.2	39	25	29	23	19	8	Zinc finger CCCH domain-containing protein 52
Solyc01g014880.2	0	0	0	10	95	89	Unknown Protein
Solyc01g014910.1	0	0	3	0	0	0	Transcription factor bHLH95
Solyc01g014920.1	3	3	3	1	0	4	Unknown Protein
Solyc01g014930.1	0	0	1	0	0	1
Solyc01g014940.1	1	0	2	1	0	4
Solyc01g014950.1	2	2	0	0	0	0	Unknown Protein
Solyc01g014980.2	2	2	5	1	1	2	Unknown Protein
Solyc01g014990.1	17	14	27	16	21	2	Unknown Protein
Solyc01g015000.2	302	351	382	216	212	63	Nitrogen regulatory protein P-II
Solyc01g015010.1	32	24	20	12	8	18	Unknown Protein
Solyc01g015020.2	306	368	352	312	292	205	PRLI-interacting factor A (Fragment)
Solyc01g015060.1	1	1	1	0	1	1	X1 (Fragment)
Solyc01g015090.1	0	2	2	4	0	0	Gag-Pol polyprotein
Solyc01g015100.1	0	2	1	0	0	0	Transposon Ty1-A Gag-Pol polyprotein
Solyc01g015110.1	2	0	2	1	1	2	Ulp1 protease family C-terminal catalytic domain containing protein
Solyc01g015120.1	0	0	1	0	0	2	Ulp1 protease family C-terminal catalytic domain containing protein
Solyc01g015130.1	1	1	1	3	3	1	F-box family protein
Solyc01g015140.1	2	7	1	3	0	0	Cytochrome b
Solyc01g015150.1	2	8	8	11	6	1	Polyprotein
Solyc01g015160.1	4	4	10	6	5	5	Unknown Protein
Solyc01g015180.1	1	2	1	0	4	1	Unknown Protein
Solyc01g015200.1	0	0	0	4	3	0	Unknown Protein
Solyc01g015220.1	6	9	6	9	9	0	Polyprotein (Fragment)
Solyc01g015260.1	0	1	0	0	0	0	Unknown Protein
Solyc01g015270.1	0	1	0	0	0	0	Unknown Protein
Solyc01g016320.1	0	0	1	1	0	0	Unknown Protein
Solyc01g016330.1	4	16	6	3	1	4	Gag-pol polyprotein
Solyc01g016340.1	1	3	7	4	2	1	Gag-pol polyprotein
Solyc01g016360.1	13	22	28	28	12	11
Solyc01g016370.1	20	36	63	25	25	22
Solyc01g016380.2	3	1	16	31	105	36	Os06g0207500 protein (Fragment)
Solyc01g016390.2	3	1	18	50	167	50	Os06g0207500 protein (Fragment)
Solyc01g016410.2	32	19	29	36	67	30	RING finger protein 43
Solyc01g016430.1	0	1	0	0	1	1	Unknown Protein
Solyc01g016460.2	0	0	0	2	3	7	Unknown Protein
Solyc01g016470.2	203	469	429	178	82	58	Unknown Protein
Solyc01g016480.1	1	2	1	0	0	3	Ulp1 protease family C-terminal catalytic domain containing protein
Solyc01g016520.1	1	1	0	0	0	1	DNA-directed RNA polymerase subunit beta%26apos%26apos
Solyc01g016530.1	1	1	0	0	0	0	Unknown Protein
Solyc01g016540.1	0	0	0	0	1	0	Os08g0100600 protein (Fragment)
Solyc01g016550.1	24	35	31	21	14	2	Unknown Protein
Solyc01g016560.1	65	65	56	32	19	13	Unknown Protein
Solyc01g016570.1	32	29	18	13	7	8	Pol polyprotein
Solyc01g016580.1	0	2	0	0	1	0	Unknown Protein
Solyc01g016600.1	2	2	0	0	1	0	Unknown Protein
Solyc01g016620.1	0	0	1	1	1	0	Unknown Protein
Solyc01g016630.1	0	0	2	1	0	0	Unknown Protein
Solyc01g016650.1	0	0	0	21	10	0	Unknown Protein
Solyc01g016660.1	2	0	1	1	2	0	Granule-bound starch synthase 2%2C chloroplastic/amyloplastic
Solyc01g016700.2	3	2	7	6	8	3	Unknown Protein
Solyc01g016710.1	1	8	8	3	2	1	Polyprotein (Fragment)
Solyc01g016720.2	2	5	1	5	12	9	Unknown Protein
Solyc01g016760.1	0	0	0	0	1	0	Unknown Protein
Solyc01g016770.1	0	0	2	0	0	0	Myb-related transcription factor
Solyc01g016790.1	2	5	4	3	2	2	Unknown Protein
Solyc01g016810.1	1	3	2	0	1	0	Unknown Protein
Solyc01g016860.1	1	2	2	3	1	0	Transposase family tnp2 protein
Solyc01g016870.1	1	1	2	1	0	0	Unknown Protein
Solyc01g016900.1	0	0	1	1	0	0	Vacuolar protein sorting-associated protein 33 homolog
Solyc01g016920.1	0	0	1	0	0	0	Unknown Protein
Solyc01g016930.1	0	0	0	0	6	0	Unknown Protein
Solyc01g016950.1	9	10	6	3	2	6	Transposon Ty1-PL Gag-Pol polyprotein
Solyc01g016970.1	1	1	0	1	0	12	Unknown Protein
Solyc01g017050.1	2551	2953	855	1215	319	889	PG1 protein (Fragment)
Solyc01g017060.1	2	3	1	4	1	1	Ycf2
Solyc01g017070.1	9	10	4	6	2	7	Ycf2
Solyc01g017080.1	4	5	3	0	0	1	Ycf2
Solyc01g017090.2	10	10	3	6	0	0	NADH-quinone oxidoreductase subunit L
Solyc01g017100.1	4	0	1	1	0	0	NADH-quinone oxidoreductase subunit L
Solyc01g017110.1	8	2	5	1	2	1	NADH dehydrogenase subunit 5 (Fragment)
Solyc01g017130.1	1	0	0	0	0	0	Ycf2
Solyc01g017140.1	7	3	3	6	2	4	Ycf2
Solyc01g017150.1	1	2	3	0	0	0	Ycf15
Solyc01g017160.1	4	1	3	1	0	0	NAD(P)H-quinone oxidoreductase subunit 2 chloroplastic
Solyc01g017170.1	9	14	5	7	4	1	NAD(P)H-quinone oxidoreductase subunit 2 chloroplastic
Solyc01g017180.1	1	3	1	0	1	0	NAD(P)H-quinone oxidoreductase subunit 2 chloroplastic
Solyc01g017190.1	4	1	4	2	1	3	NAD(P)H-quinone oxidoreductase subunit 2 chloroplastic
Solyc01g017200.1	0	1	0	2	0	1	Acetyl-coenzyme A carboxylase carboxyl transferase subunit beta
Solyc01g017210.1	1	2	0	1	0	0	NAD(P)H-quinone oxidoreductase subunit 3
Solyc01g017220.1	34	66	37	27	7	10	ATP synthase epsilon chain chloroplastic
Solyc01g017230.1	5	2	3	2	2	4	NADH dehydrogenase subunit (Fragment)
Solyc01g017240.1	3	3	1	2	1	1	Ycf1 (Fragment)
Solyc01g017250.1	2	2	3	2	0	1	Ycf1
Solyc01g017260.1	2	3	4	1	0	0	NAD(P)H-quinone oxidoreductase subunit 2 chloroplastic
Solyc01g017270.1	0	4	3	0	0	0	Ycf15
Solyc01g017280.1	0	0	0	1	1	1	Ycf2
Solyc01g017300.1	14	17	4	11	6	7	Photosystem I P700 chlorophyll a apoprotein A1
Solyc01g017310.1	4	10	3	1	0	2	Photosystem I P700 chlorophyll a apoprotein A1
Solyc01g017320.1	16	23	5	6	3	3	Photosystem I P700 chlorophyll a apoprotein A1
Solyc01g017330.1	34	26	8	10	1	9	Photosystem I P700 chlorophyll a apoprotein A1
Solyc01g017340.1	6	10	3	8	6	5	Cytochrome c biogenesis protein ccsA
Solyc01g017350.1	3	3	0	6	20	14	DNA-directed RNA polymerase subunit beta%26apos%26apos
Solyc01g017360.1	5	3	1	2	0	0	DNA-directed RNA polymerase subunit beta
Solyc01g017370.1	3	6	4	1	0	1	DNA-directed RNA polymerase subunit beta%26apos%3B
Solyc01g017380.1	3	3	2	2	0	0	DNA-directed RNA polymerase subunit beta%26apos%3B
Solyc01g017390.1	1	3	2	1	0	0	DNA-directed RNA polymerase subunit beta%26apos%3B
Solyc01g017400.1	21	21	22	3	8	8	30S ribosomal protein S7 chloroplastic
Solyc01g017410.1	13	10	5	6	1	3	Ycf2
Solyc01g017420.1	7	9	2	7	1	0	DNA-directed RNA polymerase subunit beta%26apos%26apos
Solyc01g017430.1	4	3	0	1	0	0	Cytochrome b6-f complex subunit 4
Solyc01g017440.1	4	3	1	0	0	2	DNA-directed RNA polymerase subunit alpha
Solyc01g017450.1	1	2	0	0	0	1	30S ribosomal protein S11 chloroplastic
Solyc01g017460.1	3	5	2	1	2	0	DNA-directed RNA polymerase subunit beta%26apos%3B
Solyc01g017470.1	5	3	1	1	0	0	DNA-directed RNA polymerase subunit beta%26apos%3B
Solyc01g017480.1	2	0	0	0	0	1	Ycf1 (Fragment)
Solyc01g017490.1	2991	3223	1008	1475	416	1152	Conserved protein
Solyc01g017500.1	47	53	18	22	4	11	Unknown Protein
Solyc01g017510.1	5	6	1	1	0	1	DNA-directed RNA polymerase subunit beta%26apos%26apos
Solyc01g017520.1	12	20	3	7	1	2	ATP synthase subunit a chloroplastic
Solyc01g017530.1	6	9	5	3	0	3	30S ribosomal protein S2
Solyc01g017540.1	1	0	0	0	0	0	Dirigent-like protein 1
Solyc01g017550.1	2	0	3	0	0	0	Unknown Protein
Solyc01g017560.1	3	1	0	3	0	2	Unknown Protein
Solyc01g017570.1	0	0	0	0	1	0	Unknown Protein
Solyc01g017590.1	4	3	1	2	0	2	Unknown Protein
Solyc01g017600.2	108	163	193	176	115	73	Plant viral-response family protein
Solyc01g017610.1	2	5	0	9	2	3	Alliinase (Fragment)
Solyc01g017620.1	0	0	0	0	1	0	Unknown Protein
Solyc01g017630.1	3	1	0	0	0	0	Ribosomal protein S4
Solyc01g017640.1	0	1	0	0	0	0	Unknown Protein
Solyc01g017650.1	0	0	0	1	1	0	Unknown Protein
Solyc01g017660.1	0	0	0	2	0	0	Unknown Protein
Solyc01g017680.1	2	0	0	0	1	0	Unknown Protein
Solyc01g017690.1	0	0	0	0	0	1
Solyc01g017710.1	0	0	3	0	0	0	Unknown Protein
Solyc01g017720.1	2	2	0	1	0	0	Unknown Protein
Solyc01g017730.1	1	2	3	0	1	0	Unknown Protein
Solyc01g017740.1	25	18	8	13	1	6	Cytochrome b6
Solyc01g017750.1	19	3	4	7	4	11	Unknown Protein
Solyc01g017760.1	3	0	0	1	0	0	Unknown Protein
Solyc01g017770.1	1	30	1	0	0	1	F-box family protein
Solyc01g017780.1	0	2	2	1	0	0	Transposon Ty1-BR Gag-Pol polyprotein
Solyc01g017790.1	0	0	0	1	0	1	ARID/BRIGHT DNA-binding domain-containing protein
Solyc01g017800.1	0	0	0	0	0	1	Unknown Protein
Solyc01g017810.1	0	0	2	1	0	0	Transposase family tnp2 protein
Solyc01g017820.1	0	0	0	0	1	0	Unknown Protein
Solyc01g017830.1	1	0	2	2	1	0	Transposase family tnp2 protein
Solyc01g017840.1	1	6	4	1	1	2	subunit of replication protein A
Solyc01g017850.1	2	0	0	2	0	2	Helicase-like protein
Solyc01g017860.2	4	2	14	8	6	5	Unknown Protein
Solyc01g017870.1	438	0	3	0	1	0	Unknown Protein
Solyc01g017980.1	1	1	0	0	3	0	Transposase
Solyc01g018010.1	6	7	3	3	4	1	Unknown Protein
Solyc01g018020.1	4	4	4	7	19	95	Transketolase-like protein
Solyc01g018060.1	11	10	6	2	9	2	30S ribosomal protein S7 chloroplastic
Solyc01g018090.1	18	23	2	6	1	3	Photosystem I P700 chlorophyll a apoprotein A1
Solyc01g020110.1	154	0	14	12	13	1	Zinc finger family protein
Solyc01g020120.1	14	6	6	0	1	2	DNA replication licensing factor mcm6
Solyc01g020130.2	49	58	52	66	69	24	Glycosyltransferase
Solyc01g020140.2	29	40	35	43	41	10	Glycosyltransferase
Solyc01g020150.2	23	21	35	29	31	10	Glycosyltransferase
Solyc01g020160.1	1	1	0	0	0	0	Unknown Protein
Solyc01g020170.1	2	1	0	0	0	0	Basic helix-loop-helix family protein
Solyc01g020180.1	1	0	0	0	0	0	Transcription factor bHLH95
Solyc01g020190.2	41	30	39	40	62	50	Membrane-associated ring finger 6
Solyc01g020200.1	3	10	1	4	1	2	Hypothetical chloroplast RF1
Solyc01g020210.1	3	3	2	0	2	0	Mutator-like transposase
Solyc01g020220.1	62	66	86	49	23	14	Replication factor C subunit 5
Solyc01g020230.2	11	13	16	7	5	2	Unknown Protein
Solyc01g020240.2	157	146	193	103	82	34	T31J12.1 protein (Fragment)
Solyc01g020250.1	10	24	23	21	12	8	Pol polyprotein
Solyc01g020270.1	0	3	8	1	6	2	Ulp1 protease family C-terminal catalytic domain containing protein
Solyc01g020280.1	0	1	1	0	0	1	Unknown Protein
Solyc01g020290.1	80	118	104	51	34	17	60S ribosomal protein L7A-like
Solyc01g020310.1	4	3	7	4	1	1	Pol polyprotein
Solyc01g020320.2	30	41	43	17	13	11	Unknown Protein
Solyc01g020330.2	4	9	9	7	2	2	Unknown Protein
Solyc01g020340.1	8	15	11	8	4	3	Pentatricopeptide repeat-containing protein
Solyc01g020380.1	3	1	2	3	0	0	Ulp1 protease family C-terminal catalytic domain containing protein
Solyc01g020390.1	0	0	0	1	1	0	Unknown Protein
Solyc01g020410.1	10	1	1	1	13	7	Unknown Protein
Solyc01g020430.1	0	0	0	0	1	0	Thiosulfate cyanide sulfurtransferase-like protein (Fragment)
Solyc01g020440.2	157	204	182	82	56	23	Replication factor C subunit 5
Solyc01g020450.1	0	0	0	1	0	0	Unknown Protein
Solyc01g020460.1	5	6	1	5	1	2	ORF65d
Solyc01g020470.1	8	8	5	5	1	2	NADH-ubiquinone oxidoreductase
Solyc01g020500.1	9	9	9	7	1	2	Unknown Protein
Solyc01g020510.1	2	0	2	1	0	2	Ycf2
Solyc01g020520.2	32	35	33	21	16	19	Membrane-bound transcription factor protease site 2
Solyc01g020570.1	9	13	8	4	8	2	Calcium-transporting ATPase 1
Solyc01g020580.1	1	0	0	0	0	0	Unknown Protein
Solyc01g020590.1	0	0	0	1	0	0	Unknown Protein
Solyc01g020600.1	1	0	1	0	0	0	Os11g0256400 protein (Fragment)
Solyc01g021600.2	2	2	4	3	1	0	Disease resistance response protein
Solyc01g021630.1	2	4	8	4	2	3	Ulp1 protease family C-terminal catalytic domain containing protein
Solyc01g021640.2	63	96	75	76	52	28	DDB1- and CUL4-associated factor 4
Solyc01g021650.1	0	0	0	0	0	2	Unknown Protein
Solyc01g021660.1	0	0	0	0	0	1	Ulp1 protease family C-terminal catalytic domain containing protein
Solyc01g021670.2	184	159	202	228	299	148	POT family domain containing protein expressed
Solyc01g021690.1	0	0	0	3	3	1	Unknown Protein
Solyc01g021700.1	0	1	0	0	0	0	Unknown Protein
Solyc01g021720.1	2	3	3	2	2	1	Unknown Protein
Solyc01g021730.2	359	2	2	2	2	0	NAC domain protein IPR003441
Solyc01g021740.1	196	272	341	271	188	52	Mitochondrial 2-oxoglutarate/malate carrier protein
Solyc01g022740.2	60	80	85	54	29	12	Kelch-like protein 21
Solyc01g022750.2	257	281	458	474	502	101	NADH dehydrogenase
Solyc01g022760.1	6	13	1	4	2	2	Unknown Protein
Solyc01g022770.1	5	6	1	3	2	0	Unknown Protein
Solyc01g022780.1	41	38	5	18	9	6	Unknown Protein
Solyc01g022790.1	3	7	5	3	1	1	Unknown Protein
Solyc01g028800.1	46	61	259	192	47	8	Pumilio-family RNA binding protein
Solyc01g028810.2	3153	3901	3802	2162	1567	725	chaperonin
Solyc01g028830.2	118	122	175	92	125	50	ATP binding / serine-threonine kinase
Solyc01g028840.1	2	1	1	0	0	0	Helicase-like protein
Solyc01g028850.1	1	0	1	0	0	0	Unknown Protein
Solyc01g028860.2	1285	1818	2117	999	763	490	YTH domain family 2 (Predicted)
Solyc01g028870.2	138	164	174	69	70	29	N utilization substance protein B homolog
Solyc01g028880.1	0	1	9	3	6	0	Unknown Protein
Solyc01g028890.1	1	1	2	2	3	2	Unknown Protein
Solyc01g028900.2	338	439	599	621	817	398	1-deoxy-D-xylulose-5-phosphate synthase
Solyc01g028930.2	116	129	163	178	308	96	TATA-box binding protein
Solyc01g028940.1	5	5	4	5	3	3	Unknown Protein
Solyc01g028950.1	0	0	1	0	0	0	Unknown Protein
Solyc01g028970.1	25	31	44	34	22	12	Retrotransposon gag protein
Solyc01g033980.2	14	26	28	10	12	1	Unknown Protein
Solyc01g033990.1	0	4	0	2	1	0	Genomic DNA chromosome 5 P1 clone MBG8
Solyc01g034000.1	0	0	0	1	0	0	Mutator-like transposase
Solyc01g034010.1	3	0	2	3	3	15	Serine/threonine-protein phosphatase 7 long form homolog
Solyc01g034020.2	368	427	501	401	435	119	Serine/threonine-protein phosphatase
Solyc01g034040.1	1	0	0	2	0	0	HGWP repeat containing protein-like
Solyc01g034050.1	2	8	3	5	1	3	Histone-lysine N-methyltransferase ASHR1
Solyc01g034060.1	0	0	0	1	4	2	Unknown Protein
Solyc01g034070.1	5	3	4	0	2	2	Unknown Protein
Solyc01g034080.1	23	14	7	8	4	3	Amino acid permease (Fragment)
Solyc01g034100.1	2	6	6	7	23	8	Ulp1 protease family C-terminal catalytic domain containing protein
Solyc01g034110.1	0	1	0	0	1	0	MuDR family transposase containing protein
Solyc01g034120.2	4	2	7	6	2	3	Mutator-like transposase
Solyc01g034130.1	7	12	12	6	22	14	Ulp1 protease family C-terminal catalytic domain containing protein
Solyc01g034150.2	106	127	106	74	50	70	DNA polymerase IV
Solyc01g034160.1	31	66	43	24	13	9	Pol polyprotein
Solyc01g034180.1	4	0	2	3	2	0	Unknown Protein
Solyc01g034220.1	0	1	3	2	0	1	Unknown Protein
Solyc01g035220.1	10	4	1	3	0	0	NAD(P)H-quinone oxidoreductase subunit 2 chloroplastic
Solyc01g038220.1	0	2	6	4	3	2	Unknown Protein
Solyc01g044240.2	10	14	14	16	16	15	Unknown Protein
Solyc01g044250.1	35	32	10	16	3	13	Photosystem II CP43 chlorophyll apoprotein
Solyc01g044270.2	149	174	233	127	164	63	Chaperone protein dnaJ 49
Solyc01g044290.1	13	3	9	4	1	3	Ulp1 protease family C-terminal catalytic domain containing protein
Solyc01g044320.1	3	6	6	6	12	7	Ulp1 protease family C-terminal catalytic domain containing protein
Solyc01g044330.1	2	1	7	2	4	7	Ulp1 protease family C-terminal catalytic domain containing protein
Solyc01g044340.2	21	39	40	35	26	12	Os09g0513800 protein (Fragment)
Solyc01g044350.2	108	157	138	117	91	53	Zinc finger (Ran-binding) family protein
Solyc01g044360.2	625	799	817	631	466	221	Importin beta-3
Solyc01g044370.1	9	7	11	1	4	1	MOSC domain containing protein
Solyc01g044380.1	1	0	0	0	0	0	Unknown Protein
Solyc01g044390.1	0	0	1	0	0	0	Unknown Protein
Solyc01g044410.1	2	5	7	4	0	1	Unknown Protein
Solyc01g044420.2	4	10	1	0	2	0	Calmodulin binding protein
Solyc01g044430.1	1	3	9	7	2	6	Ulp1 protease family C-terminal catalytic domain containing protein
Solyc01g044440.1	2	0	13	5	7	16	Mutator-like transposase
Solyc01g044460.1	1	4	1	0	0	0	Unknown Protein
Solyc01g044480.2	109	142	174	153	111	66	Elongation factor P
Solyc01g044490.2	114	132	182	133	149	56	Elongation factor P family protein expressed
Solyc01g044520.1	0	1	0	0	1	0	LOB domain protein 1
Solyc01g044540.1	1	2	2	2	0	0	Unknown Protein
Solyc01g044560.1	2	6	7	8	2	2	1-AMINOCYCLOPROPANE-1-CARBOXYLATE OXIDASE-like protein
Solyc01g045570.1	26	17	11	5	3	3	Ulp1 protease family C-terminal catalytic domain containing protein
Solyc01g045580.1	0	0	2	0	0	0	Ulp1 protease family C-terminal catalytic domain containing protein
Solyc01g047580.1	8	9	7	7	4	3	Unknown Protein
Solyc01g047590.1	66	66	115	97	110	25	Signal recognition particle protein
Solyc01g048590.1	247	320	110	190	42	172	Photosystem Q(B) protein
Solyc01g049650.2	590	686	940	1642	1864	289	Pyruvate kinase
Solyc01g049670.1	62	1	7	5	7	1	Unknown Protein
Solyc01g049680.2	390	386	538	372	416	142	Transcriptional activator protein Pur-alpha
Solyc01g049690.2	165	175	229	217	212	70	Transcriptional activator protein Pur-alpha
Solyc01g049700.2	23	28	34	31	16	5	Retrotransposon gag protein
Solyc01g049740.1	0	1	0	3	2	0	DNA repair and recombination protein RAD54-like
Solyc01g049750.1	0	0	0	0	1	0	Unknown Protein
Solyc01g049760.1	0	0	0	2	8	0	UDP-glucosyltransferase family 1 protein
Solyc01g049770.2	48	52	41	21	6	14	Unknown Protein
Solyc01g049780.1	0	0	3	1	0	0	Unknown Protein
Solyc01g049810.2	17	16	14	8	9	4	Pentatricopeptide repeat-containing protein
Solyc01g049820.2	1	3	1	1	1	0	Unknown Protein
Solyc01g049830.2	1	1	1	0	2	0	BY-inesin-like protein 5
Solyc01g049840.1	0	3	0	1	1	0	BY-inesin-like protein 5
Solyc01g049850.1	3	0	2	2	0	1	Ulp1 protease family C-terminal catalytic domain containing protein
Solyc01g049860.1	0	0	5	0	0	1	Mutator-like transposase
Solyc01g049880.2	23	68	25	13	12	7	Unknown Protein
Solyc01g049890.2	655	842	1227	1137	1556	514	Unknown Protein
Solyc01g049900.2	28	24	31	18	18	12	Membrane-bound transcription factor protease site 2
Solyc01g049910.2	2	3	4	1	1	3	Unknown Protein
Solyc01g049920.1	2	1	3	1	3	1	Unknown Protein
Solyc01g049930.2	2	6	2	4	2	1	Unknown Protein
Solyc01g049960.2	178	239	249	220	252	115	Unknown Protein
Solyc01g049970.1	0	0	0	1	3	19	Ulp1 protease family C-terminal catalytic domain containing protein
Solyc01g049980.2	0	0	1	22	170	191	Unknown Protein
Solyc01g050000.2	13	19	28	12	12	6	HAT family dimerisation domain containing protein
Solyc01g050010.2	17	18	31	9	4	5	HAT family dimerisation domain containing protein
Solyc01g050020.1	13	11	2	8	1	2	Photosystem II CP47 chlorophyll apoprotein
Solyc01g050040.2	60	72	54	34	39	44	RING finger protein 13
Solyc01g050050.1	2	1	2	0	2	0	Unknown Protein
Solyc01g050060.1	2	1	2	1	0	0	Unknown Protein
Solyc01g050070.2	88	79	111	110	155	107	Genomic DNA chromosome 3 P1 clone MRP15
Solyc01g055160.1	0	0	0	0	80	20	F-box
Solyc01g056200.1	7	2	4	1	0	1	Unknown Protein
Solyc01g056210.1	0	1	0	0	0	1	Unknown Protein
Solyc01g056220.2	2	0	0	15	45	15	F-box family protein
Solyc01g056240.1	0	0	1	0	0	0	S-locus F-box-like protein c
Solyc01g056250.2	0	0	0	0	1	0	S-locus F-box-like protein d
Solyc01g056260.1	2	3	3	0	0	0	Unknown Protein
Solyc01g056270.2	0	5	3	3	1	1	Unknown Protein
Solyc01g056280.2	0	0	0	13	126	5	F-box
Solyc01g056290.2	1	1	0	0	2	8	Unknown Protein
Solyc01g056310.2	98	200	7449	46083	74841	59198	Laccase-2
Solyc01g056320.1	4	5	3	4	6	3	Unknown Protein
Solyc01g056330.1	4	1	1	2	1	0	DNA-directed RNA polymerase subunit beta%26apos%26apos
Solyc01g056340.2	67	89	99	104	111	45	DET1-like protein
Solyc01g056350.1	7	17	18	7	3	5	Unknown Protein
Solyc01g056360.2	0	5	2	1096	1367	337	Unknown Protein
Solyc01g056370.2	3	0	1	1	2	4	Unknown Protein
Solyc01g056380.1	0	0	0	7	4	0	Nodulin / glutamate-ammonia ligase-like protein
Solyc01g056390.1	0	0	0	6	8	2	Nodulin / glutamate-ammonia ligase-like protein
Solyc01g056400.1	0	0	0	6	5	0	Developmental protein FluG
Solyc01g056410.1	0	0	0	4	2	0	Unknown Protein
Solyc01g056420.1	0	0	0	0	1	0	Unknown Protein
Solyc01g056430.1	0	0	0	40	27	1	Amidohydrolase family
Solyc01g056440.1	0	0	0	30	11	0	Nodulin / glutamate-ammonia ligase-like protein
Solyc01g056450.1	0	0	0	40	30	0	Glutamine synthetase I
Solyc01g056460.1	0	0	1	0	5	3	Ycf2
Solyc01g056470.1	10	14	2	6	4	1	Photosystem II CP43 chlorophyll apoprotein
Solyc01g056480.2	6	7	8	12	6	2	Unknown Protein
Solyc01g056490.1	5	6	5	8	16	2	Ulp1 protease family C-terminal catalytic domain containing protein
Solyc01g056510.1	0	0	0	2	0	0	HAT family dimerisation domain containing protein
Solyc01g056520.2	99	169	224	158	98	67	RAN binding protein 16-like
Solyc01g056530.1	5	4	1	3	0	0	Oligopeptide transporter 9
Solyc01g056550.1	5	1	2	0	0	1	Ulp1 protease family C-terminal catalytic domain containing protein
Solyc01g056560.1	11	1	2	3	2	1	Ulp1 protease family C-terminal catalytic domain containing protein
Solyc01g056570.2	271	348	478	309	213	114	Regulator of chromosome condensation (RCC1)-like protein
Solyc01g056580.2	63	87	138	167	149	54	L-aspartate oxidase
Solyc01g056590.1	5	6	5	2	4	0	Genomic DNA chromosome 5 TAC clone K21L13
Solyc01g056600.2	14	8	12	13	9	5	Ribonuclease 3
Solyc01g056610.1	3	6	9	6	6	1	Unknown Protein
Solyc01g056620.2	57	63	66	68	37	22	DsRNA-binding protein
Solyc01g056640.1	5	2	4	1	1	2	Unknown Protein
Solyc01g056650.1	2	0	1	1	2	0	Starch synthase
Solyc01g056660.1	1	0	1	10	10	0	F-box family protein
Solyc01g056670.1	7	8	1	7	0	3	NADH-quinone oxidoreductase subunit K
Solyc01g056680.1	0	0	0	1	0	0	Unknown Protein
Solyc01g056690.2	184	167	220	202	170	80	Kinase family protein
Solyc01g056720.2	150	190	224	135	177	313	Aquaporin SIP12
Solyc01g056730.1	3	13	9	4	8	4	Unknown Protein
Solyc01g056740.1	33	48	52	24	21	23	HAT dimerisation domain-containing protein-like
Solyc01g056750.1	6	18	14	12	7	3	Os11g0573200 protein (Fragment)
Solyc01g056760.2	22	25	29	19	19	7	DNA-binding protein HEXBP
Solyc01g056770.1	3	4	12	17	1	5	Unknown Protein
Solyc01g056780.2	354	365	286	102	64	32	50S ribosomal protein L34
Solyc01g056790.2	9	15	18	15	15	3	Exostosin-like
Solyc01g056800.1	10	15	18	11	14	2	Exostosin-like
Solyc01g056810.2	49	55	70	45	43	30	Syntaxin
Solyc01g056820.1	1	0	0	0	0	0	Methionine aminopeptidase
Solyc01g056830.2	9	11	13	8	9	2	Syntaxin (Fragment)
Solyc01g056840.1	4	4	0	1	0	0	DNA-directed RNA polymerase subunit beta%26apos%26apos
Solyc01g056850.2	367	569	465	248	106	31	CTP synthase
Solyc01g056860.1	19	13	13	11	4	4	Pol polyprotein
Solyc01g056870.1	1	1	2	1	1	0	Ycf2
Solyc01g056880.1	1	6	8	2	2	1	Soul heme-binding family protein
Solyc01g056890.1	28	28	36	12	19	7	Unknown Protein
Solyc01g056900.1	8	6	2	5	5	0	Unknown Protein
Solyc01g056910.1	10	4	7	4	1	3	Protease Do-like 7
Solyc01g056930.1	1	5	0	0	0	0	Hypothetical chloroplast RF1
Solyc01g056940.2	2166	2876	2657	1427	957	273	Ubiquitin
Solyc01g056960.1	1	0	0	0	2	0	Unknown Protein
Solyc01g056980.2	25	30	40	39	31	6	Unknown Protein
Solyc01g056990.2	35	57	38	4	4	0	Genomic DNA chromosome 5 BAC clone F15M7
Solyc01g057000.2	13	23	33	5	10	15	Universal stress protein family protein
Solyc01g057010.1	0	0	1	45	148	3	F-box family protein
Solyc01g057020.2	29	44	58	37	31	10	PDE320
Solyc01g057030.1	0	0	1	0	0	0	Unknown Protein
Solyc01g057040.2	111	155	141	103	87	42	PDE320
Solyc01g057060.1	0	0	2	1	1	1	Arabidopsis protein targeted to chloroplast protein At3g28460
Solyc01g057070.1	8	10	13	10	3	4	Arabidopsis protein targeted to chloroplast protein At3g28460
Solyc01g057090.2	104	112	157	110	164	83	Rhodopsin-like receptor
Solyc01g057100.1	5	3	0	2	0	0	DNA-directed RNA polymerase subunit beta%26apos%26apos
Solyc01g057150.1	2	0	0	1	0	1	Unknown Protein
Solyc01g057160.1	4	6	9	6	7	2	Unknown Protein
Solyc01g057170.2	1	0	1	2	0	0	Unknown Protein
Solyc01g057180.1	1	2	2	4	3	0	Unknown Protein
Solyc01g057190.1	0	0	0	123	160	7	F-box
Solyc01g057200.2	97	110	97	41	65	28	Pentatricopeptide repeat-containing protein
Solyc01g057210.2	348	363	486	320	338	186	Pyruvate dehydrogenase kinase
Solyc01g057220.2	1	0	2	0	1	722	Pectinesterase
Solyc01g057240.1	11	11	32	22	19	8	50S ribosomal protein L3-2
Solyc01g057250.1	1	4	2	4	1	1	50S ribosomal protein L3-2
Solyc01g057260.2	5	14	13	10	5	2	Os06g0524700 protein (Fragment)
Solyc01g057270.2	1086	42	50	13	21	9	Calmodulin-binding transcription activator 1
Solyc01g057280.1	10	22	18	10	13	3	26S proteasome non-ATPase regulatory subunit 9
Solyc01g057310.2	123	124	55	28	13	14	Kinesin (Centromeric protein)-like protein
Solyc01g057320.1	30	29	6	6	5	1	Kinesin-like protein
Solyc01g057330.1	16	17	17	15	10	3	Yellow stripe-like protein 1.3 (Fragment)
Solyc01g057340.2	51	34	35	20	15	11	Unknown Protein
Solyc01g057350.1	0	1	0	0	2	0	Unknown Protein
Solyc01g057370.1	3	0	0	0	0	8	Poly polymerase catalytic domain containing protein expressed
Solyc01g057380.1	0	0	0	0	0	3	Unknown Protein
Solyc01g057390.2	0	0	0	0	3	13	Unknown Protein
Solyc01g057430.2	16	0	2	0	0	1	Chloroplast carboxyltransferase alpha subunit
Solyc01g057440.2	1	1	5	2	1	0	Unknown Protein
Solyc01g057460.2	46	55	56	37	49	35	CTV.22
Solyc01g057480.1	0	0	0	1	0	1	Helicase-like protein
Solyc01g057490.2	3	1	1	1	5	3	Unknown Protein
Solyc01g057510.1	536	7	1	0	1	0	Bax inhibitor 1
Solyc01g057520.2	176	172	174	92	95	47	Genomic DNA chromosome 3 P1 clone MGD8
Solyc01g057530.1	0	1	0	1	0	0	Unknown Protein
Solyc01g057540.1	1	0	0	0	0	0	Unknown Protein
Solyc01g057550.1	0	0	0	1	0	0	Retrovirus-related Pol polyprotein from transposon 17.6
Solyc01g057560.1	0	2	3	9	4	1
Solyc01g057570.2	59	79	92	44	57	22	Alkylated DNA repair protein alkB
Solyc01g057580.1	38	35	36	32	21	8	Kinase family protein
Solyc01g057590.1	91	3	1	0	0	0	Unknown Protein
Solyc01g057600.2	3	5	8	0	1	0	Unknown Protein
Solyc01g057610.1	1	0	0	0	0	0	Unknown Protein
Solyc01g057630.1	0	0	0	0	1	0	Unknown Protein
Solyc01g057640.1	0	0	1	0	0	0	Unknown Protein
Solyc01g057680.2	8	10	120	30	32	17	Hcr2-p4.1
Solyc01g057690.1	0	3	2	2	3	1	Unknown Protein
Solyc01g057700.1	2	10	2	25	51	10	Calcium-dependent protein kinase 4
Solyc01g057720.1	0	0	1	0	0	3	Helitron helicase-like protein
Solyc01g057730.1	3	1	0	2	0	4	Unknown Protein
Solyc01g057760.2	342	526	480	270	216	117	ATP dependent RNA helicase
Solyc01g057770.2	267	306	309	133	100	61	AE family transporter anion exchange
Solyc01g057780.2	185	233	223	115	79	87	Zinc finger protein VAR3%2C chloroplastic
Solyc01g057800.1	0	0	0	1	1	1	Unknown Protein
Solyc01g057830.2	808	824	709	291	257	93	30S ribosomal protein S1
Solyc01g057840.2	101	154	140	96	92	44	Serologically defined colon cancer antigen 1 (Fragment)
Solyc01g057850.2	53	77	78	70	77	35	Serologically defined colon cancer antigen 1 (Fragment)
Solyc01g057860.1	0	0	0	0	1	0	Unknown Protein
Solyc01g057870.1	4	6	16	6	3	7	Unknown Protein
Solyc01g057880.1	0	7	4	3	2	3	Ulp1 protease family C-terminal catalytic domain containing protein
Solyc01g057890.1	1	0	0	0	2	0	Mutator-like transposase
Solyc01g057900.2	189	268	343	351	300	108	Ubiquitin-protein ligase
Solyc01g057910.2	14	4	5	0	1	3	MYB transcription factor
Solyc01g057940.1	2	1	0	1	0	0	Unknown Protein
Solyc01g057960.1	6	23	16	29	21	17	Class III homeodomain-leucine zipper
Solyc01g057970.1	9	11	11	13	3	0	Unknown Protein
Solyc01g057980.2	279	332	309	322	379	236	Unknown Protein
Solyc01g058000.2	176	210	210	192	245	145	HR7 protein
Solyc01g058010.2	96	110	160	93	79	41	Neutral invertase
Solyc01g058020.2	60	74	99	54	39	29	Neutral invertase
Solyc01g058030.1	6	8	4	1	0	0	Gibberellin 2-oxidase
Solyc01g058040.1	1	2	1	0	0	0	Gibberellin 2-oxidase
Solyc01g058060.1	1	2	5	2	0	0	Unknown Protein
Solyc01g058070.1	32	5	3	7	13	1	Unknown Protein
Solyc01g058080.1	0	1	0	0	0	1	Unknown Protein
Solyc01g058090.1	0	0	0	0	1	0	Unknown Protein
Solyc01g058100.2	27	44	27	7	5	0	Unknown Protein
Solyc01g058120.1	0	1	0	0	0	0	Unknown Protein
Solyc01g058140.2	187	239	279	199	199	136	Beta-glucosidase A
Solyc01g058150.1	0	1	0	0	1	1	Ulp1 protease family C-terminal catalytic domain containing protein
Solyc01g058160.2	92	101	83	30	25	15	Agenet domain-containing protein
Solyc01g058170.2	90	117	96	37	22	14	Agenet domain-containing protein
Solyc01g058190.2	140	173	145	65	74	31	30S ribosomal protein S6
Solyc01g058200.2	52	68	69	20	31	10	Unknown Protein
Solyc01g058210.1	77	92	85	175	173	61	Gelsolin
Solyc01g058220.1	18	24	16	20	12	7	At2g42220/T24P15.13 (Fragment)
Solyc01g058250.1	2	0	0	0	0	2	Gibberellin 3-beta-hydroxylase (Fragment)
Solyc01g058260.2	395	523	681	387	280	240	Poly(A) polymerase
Solyc01g058270.2	56	79	99	146	104	21	CAS1 domain containing 1
Solyc01g058280.2	205	264	315	398	487	172	Transmembrane protein 93
Solyc01g058320.2	84	73	58	72	115	145	T6A9.7 protein
Solyc01g058330.1	1	2	0	0	1	1	Unknown Protein
Solyc01g058340.1	2	0	0	0	0	0	Unknown Protein
Solyc01g058350.1	6	6	9	2	0	4	Unknown Protein
Solyc01g058360.1	20	32	73	12	15	2	Major facilitator superfamily transporter
Solyc01g058370.1	0	0	0	1	1	0	Helitron helicase-like protein
Solyc01g058380.1	64	70	96	130	138	22	Coatomer subunit gamma
Solyc01g058390.2	164	375	321	373	391	110	Galactokinase
Solyc01g058400.1	0	0	0	1	1	4	Unknown Protein
Solyc01g058410.1	290	243	117	300	111	105	Unknown Protein
Solyc01g058420.1	0	0	0	1	0	0	Ribosomal protein S3 (Fragment)
Solyc01g058430.1	1	2	109	6	22	41	Mutator-like transposase
Solyc01g058440.1	0	0	2	1	0	1	Unknown Protein
Solyc01g058450.2	198	227	257	179	104	50	RNA binding protein
Solyc01g058460.1	3	3	4	0	2	4	Unknown Protein
Solyc01g058470.1	31	31	29	21	7	7	Unknown Protein
Solyc01g058490.1	28210	26758	9357	16700	5247	12151	Unknown Protein
Solyc01g058500.2	58294	53171	18564	35935	11415	25081	Unknown Protein
Solyc01g058510.1	1	0	1	0	0	10	Unknown Protein
Solyc01g058520.2	1888	1422	41	8	7	2	Peroxidase 40
Solyc01g058530.2	222	194	39	11	19	14	30S ribosomal protein S18 family
Solyc01g058540.2	3	0	4	2	1	1	WRKY transcription factor 31
Solyc01g058550.1	1	5	5	2	5	2	Unknown Protein
Solyc01g058560.1	0	0	1	2	0	1	Unknown Protein
Solyc01g058570.1	0	0	1	0	2	0	Ulp1 protease family C-terminal catalytic domain containing protein
Solyc01g058590.1	5	2	9	5	5	0	Ubiquitin-like domain containing CTD phosphatase 1
Solyc01g058600.1	0	1	0	0	0	1	Unknown Protein
Solyc01g058610.1	1	1	0	0	0	0	MuDR family transposase containing protein
Solyc01g058650.2	0	0	1	1	0	0	Prefoldin subunit 3
Solyc01g058660.1	0	1	0	0	0	0	Unknown Protein
Solyc01g058670.2	299	453	468	252	289	114	Transcription factor
Solyc01g058690.1	7	12	11	4	4	4	Zinc finger CCCH domain-containing protein 41
Solyc01g058700.1	1	0	0	0	0	0	Unknown Protein
Solyc01g058720.2	136	221	404	83	90	575	NaCl-inducible Ca2+-binding protein
Solyc01g058730.2	392	416	633	521	677	196	Os03g0310500 protein (Fragment)
Solyc01g058740.2	0	3	0	10	20	1	Unknown Protein
Solyc01g059750.1	3	0	1	1	2	2	Unknown Protein
Solyc01g059760.1	2	10	8	4	9	5	Ulp1 protease family C-terminal catalytic domain containing protein
Solyc01g059800.1	0	0	0	1	0	0	Unknown Protein
Solyc01g059830.2	121	146	205	231	329	86	Enoyl-CoA hydratase
Solyc01g059850.2	0	0	1	0	2	0	Unknown Protein
Solyc01g059860.2	217	254	248	161	177	81	Kinase family protein
Solyc01g059870.2	471	588	454	252	211	172
Solyc01g059880.2	963	544	672	1127	1507	365	ATP citrate lyase a-subunit
Solyc01g059890.1	1	2	5	1	1	1	Unknown Protein
Solyc01g059900.2	2	5	4	160	143	5	Dirigent-like protein
Solyc01g059910.2	1	3	2	10	132	1662
Solyc01g059920.2	118	111	91	32	25	14	Genomic DNA chromosome 3 TAC clone K14A17
Solyc01g059930.2	339	508	733	513	641	425	Universal stress protein
Solyc01g059940.2	3	25	2	1	942	1276	Pectinesterase inhibitor
Solyc01g059950.1	0	39	0	0	0	0	GAI-like protein 1 (Fragment)
Solyc01g059970.1	0	0	0	2	1	1	Mutator-like transposase
Solyc01g059980.2	56	102	92	271	69	81	Beta-glucanase
Solyc01g059990.2	2	6	16	174	31	33	Serine/threonine-protein phosphatase 7 long form homolog
Solyc01g060000.1	1	0	0	20	0	1	Mutator-like transposase
Solyc01g060020.2	0	0	0	1	2	18	Beta-glucanase
Solyc01g060030.2	247	289	285	208	223	115	Zinc finger CCHC domain-containing protein 10
Solyc01g060040.2	188	263	287	198	150	58	Bromodomain and WD repeat-containing protein 1 (Predicted)
Solyc01g060050.1	18	52	56	47	57	10	WD-40 repeat protein-like
Solyc01g060070.2	25	25	267	1628	1930	23	Pore protein homolog
Solyc01g060080.2	193	219	237	189	169	87	Serine/threonine-protein phosphatase 4 regulatory subunit 3
Solyc01g060090.1	8	19	18	17	15	4	Serine/threonine-protein phosphatase 4 regulatory subunit 3
Solyc01g060100.2	7	8	8	6	10	2	Unknown Protein
Solyc01g060110.1	0	1	0	1	2	5	Mutator-like transposase
Solyc01g060120.1	1	0	0	0	1	1	Ulp1 protease family C-terminal catalytic domain containing protein
Solyc01g060130.2	90	136	357	123	118	51	ADP-ribosylation factor-like protein 3
Solyc01g060140.2	348	432	499	278	203	162	Calmodulin-binding transcription activator 5
Solyc01g060150.2	52	85	76	74	49	48	Unknown Protein
Solyc01g060160.1	1	5	3	1	0	2	Unknown Protein
Solyc01g060170.2	48	55	83	32	66	30	Calmodulin-binding transcription activator 5
Solyc01g060180.2	237	274	241	77	92	50	AMP-dependent synthetase and ligase
Solyc01g060190.1	17	15	11	17	14	7	Mutator-like transposase
Solyc01g060200.1	11	26	30	17	12	9	3%26apos-5%26apos exonuclease domain-containing protein-like
Solyc01g060210.2	22	24	7	3	5	1	X1 (Fragment)
Solyc01g060220.1	0	0	0	0	17	0	Unknown Protein
Solyc01g060240.2	80	92	232	361	484	223	Unknown Protein
Solyc01g060250.2	18	10	30	16	5	3	Unknown Protein
Solyc01g060260.2	1	2	1	0	1	32	Unknown Protein
Solyc01g060270.1	19	1	0	0	0	0	Os06g0207500 protein (Fragment)
Solyc01g060280.2	68	105	134	85	97	48	STAM binding protein
Solyc01g060290.1	64	56	19	34	8	26	Unknown Protein
Solyc01g060300.1	150	143	36	74	19	67	MADS-box transcription factor
Solyc01g060320.1	90	86	26	42	7	41	Unknown Protein
Solyc01g060330.1	10	4	3	1	1	1	Ulp1 protease family C-terminal catalytic domain containing protein
Solyc01g060340.1	0	0	0	0	0	1	Endo-1 4-beta-glucanase
Solyc01g060350.1	1	0	0	0	0	3	Unknown Protein
Solyc01g060370.1	0	0	0	0	4	2	B3 domain-containing protein Os04g0386900
Solyc01g060380.1	10	6	3	5	13	4	cDNA clone J065202E18 full insert sequence
Solyc01g060390.1	11	11	8	15	21	6	Unknown Protein
Solyc01g060410.2	133	141	70	22	17	3	Unknown Protein
Solyc01g060420.2	14	13	8	5	0	0	Zinc finger protein 6
Solyc01g060430.1	2	1	4	0	1	0	Unknown Protein
Solyc01g060440.1	2	0	0	0	0	0	Unknown Protein
Solyc01g060450.2	6	11	10	3	6	1	Unknown Protein
Solyc01g060460.1	24	29	28	13	7	7	DNA repair protein
Solyc01g060470.2	546	880	606	360	331	175	Importin alpha-1b subunit
Solyc01g060480.1	0	0	0	0	2	0	TNP2
Solyc01g060490.2	9	7	5	1	2	0	GATA transcription factor 22
Solyc01g065490.2	50	77	90	37	36	31	Aldo/keto reductase
Solyc01g065500.2	75	78	124	79	69	28	Phosphoribosylanthranilate transferase (Fragment)
Solyc01g065510.2	292	369	484	242	181	24	Unknown Protein
Solyc01g065520.1	0	1	0	1	0	0	Unknown Protein
Solyc01g065530.2	158	217	306	141	131	77	COBRA-like protein
Solyc01g065540.2	199	226	270	209	193	67	Response regulator 8
Solyc01g065550.2	121	117	150	134	228	200	Protein DEHYDRATION-INDUCED 19 homolog 4
Solyc01g065560.2	135	85	88	53	33	26	Os08g0100600 protein (Fragment)
Solyc01g065570.2	19	20	29	78	118	2	Chaperone protein dnaJ 49
Solyc01g065580.2	222	349	296	96	90	40	Pumilio domain-containing protein KIAA0020
Solyc01g065590.1	0	1	0	2	0	0	Lipoprotein
Solyc01g065600.1	2	3	2	3	2	0	NAD(P)H-quinone oxidoreductase chain 4%2C chloroplastic
Solyc01g065610.1	3	2	1	1	2	5	NAD(P)H-quinone oxidoreductase chain 4%2C chloroplastic
Solyc01g065620.1	3	5	3	4	1	2	NAD(P)H-quinone oxidoreductase chain 4%2C chloroplastic
Solyc01g065630.1	3	1	1	3	3	5	NAD(P)H-quinone oxidoreductase chain 4%2C chloroplastic
Solyc01g065640.1	3	2	2	2	5	2	NAD(P)H-quinone oxidoreductase chain 4%2C chloroplastic
Solyc01g065680.2	14	6	16	12	11	3	Unknown Protein
Solyc01g065690.2	24	47	79	45	38	18	Heavy-metal associated domain protein
Solyc01g065700.2	5	4	3	6	8	4	Integrin-linked kinase-associated serine/threonine phosphatase 2C
Solyc01g065710.2	48	79	56	38	30	10	Unknown Protein
Solyc01g065720.2	133	236	270	301	339	209	Phospholipase D
Solyc01g065740.2	15	27	52	36	36	6	F-box family protein
Solyc01g065750.2	7	14	44	13	8	7	Unknown Protein
Solyc01g065760.1	6	2	1	1	0	0	NAD(P)H-quinone oxidoreductase subunit 2 chloroplastic
Solyc01g065770.1	6	7	1	5	2	3	NADH-quinone oxidoreductase subunit D
Solyc01g065780.1	2	2	2	1	1	2	NADH-quinone oxidoreductase subunit D
Solyc01g065790.1	5	6	6	2	2	2	Unknown Protein
Solyc01g065800.1	0	4	3	2	0	0	Unknown Protein
Solyc01g065810.1	2	6	2	4	3	0	NADH-quinone oxidoreductase subunit D
Solyc01g065820.1	0	1	3	0	0	0	Unknown Protein
Solyc01g065830.1	2	1	1	0	11	2	Unknown Protein
Solyc01g065840.2	133	184	235	134	83	43	F-box/LRR-repeat protein At3g03360
Solyc01g065850.1	0	0	0	1	5	9	Unknown Protein
Solyc01g065860.1	0	0	0	1	0	0	Helitron helicase-like protein
Solyc01g065870.1	0	0	0	1	0	0	Helitron helicase-like protein
Solyc01g065880.1	0	0	0	1	0	0	Helitron helicase-like protein
Solyc01g065900.1	1	0	0	2	0	1	Gt-2-related-like
Solyc01g065910.1	0	0	5	3	0	0	Periaxin-like protein
Solyc01g065920.1	2	4	3	1	2	1	Unknown Protein
Solyc01g065930.1	4	0	0	0	1	0	Unknown Protein
Solyc01g065960.1	1	1	4	3	0	0	Unknown Protein
Solyc01g065980.2	383	514	484	315	226	194	Ethylene responsive transcription factor 2b
Solyc01g065990.1	2	0	1	1	0	0	Unknown Protein
Solyc01g066000.1	41	41	47	50	53	46	Unknown Protein
Solyc01g066010.1	72	82	75	30	31	26	Zinc finger CCCH domain-containing protein 53
Solyc01g066020.1	73	11	9	80	59	3
Solyc01g066030.1	0	1	0	0	0	0	Mutator-like transposase
Solyc01g066050.2	426	409	469	420	563	226	Peptidyl-prolyl cis-trans isomerase FKBP5
Solyc01g066060.2	75	81	117	63	42	13	DAG protein
Solyc01g066070.2	2	7	7	117	494	2795	Polygalacturonase
Solyc01g066080.1	6	7	5	7	7	35	O-glucosyltransferase 3
Solyc01g066100.1	3	3	4	5	3	34	UDP-glucosyltransferase family 1 protein
Solyc01g066110.1	5	3	5	5	4	37	Glucosyltransferase
Solyc01g066120.1	0	0	0	1	0	3	Glucosyltransferase
Solyc01g066140.1	3	1	1	2	1	12	UDP-glucosyltransferase family 1 protein
Solyc01g066150.1	6	2	5	3	2	27	Glucosyltransferase
Solyc01g066170.1	15	2	1	0	0	0	Ulp1 protease family C-terminal catalytic domain containing protein
Solyc01g066180.1	2	0	6	4	0	0	Mutator-like transposase
Solyc01g066200.1	0	0	1	0	0	0	Unknown Protein
Solyc01g066210.1	2	0	0	0	1	0	Unknown Protein
Solyc01g066230.1	8	0	0	0	2	5	Unknown Protein
Solyc01g066240.1	1	0	0	0	0	0	Unknown Protein
Solyc01g066250.1	1	0	0	0	0	0	Unknown Protein
Solyc01g066260.2	4	1	2	0	0	0	Unknown Protein
Solyc01g066270.2	1	1	5	0	2	0	Unknown Protein
Solyc01g066280.1	1	0	1	0	0	0	Unknown Protein
Solyc01g066290.2	6	3	8	2	3	4	Unknown Protein
Solyc01g066300.1	0	1	0	1	0	0	Unknown Protein
Solyc01g066310.2	207	271	419	222	215	142	Acyl-CoA dehydrogenase
Solyc01g066320.1	0	0	0	0	1	0	Unknown Protein
Solyc01g066330.1	0	0	0	0	1	0	Unknown Protein
Solyc01g066340.2	32	18	29	38	75	76	Unknown Protein
Solyc01g066360.2	15	43	33	2102	18688	10448	Pectinesterase
Solyc01g066370.2	27	74	67	6265	26631	33525	Pectinesterase
Solyc01g066380.2	56	137	135	10788	47543	59733	Unknown Protein
Solyc01g066390.2	35	75	82	5529	25649	32399	Unknown Protein
Solyc01g066400.1	1	2	4	59	229	282	Pectinesterase
Solyc01g066410.1	0	1	0	97	300	321	Pectinesterase
Solyc01g066420.2	61	140	146	12127	50079	60671	Pectinesterase
Solyc01g066430.2	46	72	30	29	71	66	Ring H2 finger protein
Solyc01g066440.2	102	83	65	29	29	10	Unknown Protein
Solyc01g066450.2	32	100	16	5	11	2	Epoxide hydrolase
Solyc01g066460.2	41	117	292	134	163	50	Epoxide hydrolase
Solyc01g066470.2	40	89	173	79	82	35	Epoxide hydrolase
Solyc01g066480.2	88	115	149	156	126	27	Fumarylacetoacetate hydrolase domain-containing protein 1
Solyc01g066490.2	16	11	11	6	3	13	Unknown Protein
Solyc01g066500.1	55	5	1	0	0	0	MADS-box transcription factor 22
Solyc01g066510.1	20	13	59	82	67	39	Genomic DNA chromosome 5 TAC clone K21P3
Solyc01g066520.2	96	151	356	348	492	153	Dihydrolipoyllysine-residue acetyltransferase component of pyruvate dehydrogenase complex
Solyc01g066560.2	9	21	154	268	471	215	Multidrug resistance protein mdtK
Solyc01g066570.2	67	79	45	36	33	30	Genomic DNA chromosome 5 TAC clone K14A3
Solyc01g066580.1	5	7	5	4	3	0	Unknown Protein
Solyc01g066590.2	208	217	221	183	203	116	Dynein light chain 2 cytoplasmic
Solyc01g066600.2	18	17	8	7	2	0	Unknown Protein
Solyc01g066610.2	53	38	31	16	7	1	Fanconi anemia group I protein
Solyc01g066620.2	9	1078	12	18	17	10	Fatty acid oxidation complex subunit alpha
Solyc01g066640.2	292	229	198	91	97	17	Os04g0405500 protein (Fragment)
Solyc01g066680.2	113	131	144	60	35	23	Phylloplanin
Solyc01g066690.2	207	207	242	215	250	105	Translation initiation factor 2 gamma subunit
Solyc01g066700.2	9	13	190	1020	2151	55	Bifunctional polymyxin resistance protein ArnA
Solyc01g066710.2	5	6	101	825	1685	25	Unknown Protein
Solyc01g066720.2	238	279	312	170	222	154	Hypoxia induced protein conserved region containing protein
Solyc01g066730.2	226	33	31	21	16	36	MADS-box protein
Solyc01g066740.2	469	632	677	332	287	144	Transducin family protein (Fragment)
Solyc01g066750.1	1	0	1	0	1	0	Unknown Protein
Solyc01g066760.2	84	77	62	25	14	2	Unknown Protein
Solyc01g066770.2	132	68	61	51	99	376	Chaperone protein dnaJ 49
Solyc01g066790.1	0	1	1	0	1	1	Unknown Protein
Solyc01g066800.1	0	0	0	0	1	1	Actin
Solyc01g066810.2	24	52	42	6417	17436	18650	Universal stress protein
Solyc01g066820.2	36	30	80	102	203	104	Kinesin like protein
Solyc01g066830.2	81	104	111	62	65	45	Sentrin-specific protease 2
Solyc01g066840.2	1156	1441	1473	809	549	228	40S ribosomal protein S21
Solyc01g066850.2	16	9	17	9	10	4	Nodulin MtN21 family protein
Solyc01g066860.2	120	95	137	89	64	27	Unknown Protein
Solyc01g066870.2	79	94	81	190	405	35	Protein phosphatase 2C containing protein
Solyc01g066880.2	42	55	53	26	21	17	Copper chaperone
Solyc01g066900.2	95	66	47	13	8	5	Os12g0541400 protein (Fragment)
Solyc01g066910.2	202	145	61	22	9	11	PVR3-like protein
Solyc01g066930.1	2	6	2	6	11	1	Ulp1 protease family C-terminal catalytic domain containing protein
Solyc01g066940.2	36	47	47	35	22	11	Vesicle-associated membrane protein 7B
Solyc01g066950.1	1	0	3	3	17	20	Flowering promoting factor-like 1 (Fragment)
Solyc01g066960.1	0	1	1	1	0	0	Unknown Protein
Solyc01g066970.2	8	2	11	19	55	72	Flowering promoting factor-like 1 (Fragment)
Solyc01g066980.2	0	0	0	1	2	5	Flowering promoting factor-like 1 (Fragment)
Solyc01g066990.1	3	8	8	2	2	5	Unknown Protein
Solyc01g067000.2	90	66	89	110	162	92	SRC2 homolog (Fragment)
Solyc01g067010.2	61	52	98	105	121	38	F-box family protein
Solyc01g067020.2	306	3	27	6	4	17
Solyc01g067030.2	54	42	19	16	9	8	F-box family protein
Solyc01g067040.1	72	75	44	23	12	2	PWWP domain-containing protein
Solyc01g067050.1	1	2	2	8	1	1	Gag-Pol polyprotein
Solyc01g067060.1	0	0	0	0	1	3	HAT family dimerisation domain containing protein
Solyc01g067070.2	84	134	235	803	2029	1680	Mitochondrial deoxynucleotide carrier
Solyc01g067080.2	32	51	79	88	114	25	Genomic DNA chromosome 3 P1 clone MHC9
Solyc01g067090.2	85	118	130	79	67	26	Homeodomain-like
Solyc01g067100.2	442	593	657	689	772	431	Cullin 1-like protein C
Solyc01g067110.1	0	0	1	0	0	0	Unknown Protein
Solyc01g067120.2	14	17	14	12	10	6	Cullin 1-like protein C
Solyc01g067130.2	47	6	0	1	0	10	Nuclear transcription factor Y subunit B-3
Solyc01g067140.1	25	49	40	35	47	29	Cullin 1-like protein C
Solyc01g067150.1	3	10	12	7	10	5	Unknown Protein
Solyc01g067160.2	15	9	18	25	9	3	Unknown Protein
Solyc01g067170.1	21	41	33	28	29	20	Cullin 1-like protein C
Solyc01g067180.2	15	20	19	14	11	9	Cullin 1-like protein C
Solyc01g067190.1	1	0	1	0	0	0	Unknown Protein
Solyc01g067200.1	1	4	9	13	8	3	Cullin 1-like protein C
Solyc01g067210.2	54	76	78	72	84	44	Cullin 1-like protein C
Solyc01g067220.1	1	4	2	0	1	0	Unknown Protein
Solyc01g067230.2	4	9	13	20	9	5	Cullin 1-like protein C
Solyc01g067240.2	26	28	35	30	17	11	Cullin-like protein1
Solyc01g067250.2	24	28	30	27	16	11	Cullin 1-like protein C
Solyc01g067260.2	14	12	25	27	18	6	Cullin 1-like protein C
Solyc01g067270.2	36	33	41	45	22	16	Cullin 1-like protein C
Solyc01g067280.2	47	78	79	72	75	32	F-box domain containing protein
Solyc01g067290.2	382	446	309	120	120	43	NAD-dependent epimerase/dehydratase
Solyc01g067300.2	5	11	1	15	25	34	UPF0497 membrane protein 13
Solyc01g067310.1	1	0	2	2	2	1	Unknown Protein
Solyc01g067320.1	2	0	1	2	1	0	Receptor protein kinase-like
Solyc01g067330.2	0	1	0	0	1	0	UPF0497 membrane protein 4
Solyc01g067340.1	2	8	5	0	0	0	Unknown Protein
Solyc01g067350.2	619	3	1	2	0	0	UDP-glucosyltransferase
Solyc01g067360.2	60	78	62	45	42	34	CHY zinc finger family protein expressed
Solyc01g067370.2	122	5	2	1	98	3558	Pollen-specific lysine-rich protein SBgLR
Solyc01g067380.2	42	102	88	79	139	153	Lipase
Solyc01g067390.2	574	721	646	509	452	226	Chromodomain-helicase-DNA-binding protein 2
Solyc01g067400.2	369	298	333	217	208	102	Serine/threonine-protein kinase
Solyc01g067410.1	3	2	10	12	4	9	Pectinesterase
Solyc01g067420.2	8	4	14	17	6	9	Pectinesterase
Solyc01g067430.1	1	0	1	0	1	0	Unknown Protein
Solyc01g067440.2	1	2	1	0	2	2	Glutaredoxin
Solyc01g067450.1	1	2	0	1	0	1	Mutator-like transposase-like
Solyc01g067460.1	2	18	13	25	31	17	Glutaredoxin family protein
Solyc01g067480.2	244	233	226	90	56	18	Kelch-domain-containing protein
Solyc01g067490.2	119	149	170	120	94	27	Anaphase-promoting complex subunit 7
Solyc01g067500.2	295	322	338	292	528	347	Serine/threonine-protein phosphatase 2A regulatory subunit B%26apos%3B%26apos%3B subunit gamma
Solyc01g067510.2	350	294	387	66	44	9	Receptor-like kinase
Solyc01g067520.2	4	0	3	180	625	277	Cellulose synthase D-like protein
Solyc01g067530.2	143	161	119	54	43	27	GTPase obg
Solyc01g067540.1	1	0	0	0	0	0	Ethylene responsive transcription factor 12
Solyc01g067550.2	256	368	412	312	306	108	Zinc finger CCCH domain-containing protein 58
Solyc01g067560.2	118	175	164	121	133	105	Always early protein 3
Solyc01g067570.2	70	76	146	74	53	34	Unknown Protein
Solyc01g067580.2	103	95	93	48	34	29	Unknown Protein
Solyc01g067590.2	187	267	296	259	236	87	5%26apos-AMP-activated protein kinase gamma-1 subunit
Solyc01g067600.2	229	335	431	383	368	246	CW-type Zinc Finger family protein expressed
Solyc01g067610.2	65	54	76	56	42	24	Unknown Protein
Solyc01g067620.2	22	50	20	13	6	31	1-aminocyclopropane-1-carboxylate oxidase
Solyc01g067630.2	77	84	80	42	41	10	MRNA complete cds clone RAFL24-13-K22
Solyc01g067640.2	191	243	167	122	113	56	Cell division protein kinase 12
Solyc01g067660.2	836	1178	1131	781	1255	1490	Beta-amylase
Solyc01g067670.2	56	78	141	101	76	21	Unknown Protein
Solyc01g067680.2	97	130	223	178	150	47	Tubby-like F-box protein 6
Solyc01g067690.2	28	24	36	31	54	24	Unknown Protein
Solyc01g067700.2	29	54	42	50	93	52	Unknown Protein
Solyc01g067710.2	164	196	273	176	269	110	Sodium/hydrogen exchanger
Solyc01g067720.2	79	79	81	94	50	30	Vesicle-associated membrane protein-associated protein
Solyc01g067730.2	2566	4318	3350	3544	3078	370	Acyl carrier protein
Solyc01g067740.2	2110	2479	3433	2193	2355	1624	Superoxide dismutase
Solyc01g067750.2	450	453	561	520	505	321	Shikimate dehydrogenase
Solyc01g067760.1	21	12	11	7	2	3	Photosystem I reaction center subunit IX
Solyc01g067780.1	5	7	9	3	2	1	Chaperone protein dnaJ 49
Solyc01g067790.2	66	121	152	83	76	19	Mediator of DNA damage checkpoint protein 1
Solyc01g067800.2	235	238	274	132	106	47	E3 ubiquitin-protein ligase MARCH1
Solyc01g067810.1	1	1	6	2	4	1	Unknown Protein
Solyc01g067820.2	27	44	79	45	47	21	Unknown Protein
Solyc01g067830.2	64	76	103	65	65	35	U1 small nuclear ribonucleoprotein C protein
Solyc01g067840.2	0	1	0	0	2	3	Unknown Protein
Solyc01g067860.2	1	0	0	0	0	0	Peroxidase 24
Solyc01g067870.2	1	1	0	0	0	0	Peroxidase 24
Solyc01g067880.1	1	0	0	0	0	0	Peroxidase 27
Solyc01g067890.2	1079	1246	1037	708	627	372	1-deoxy-D-xylulose 5-phosphate synthase 1
Solyc01g067900.2	454	556	636	272	262	185	Rapid alkalinization factor 2
Solyc01g067910.2	20	12	23	30	29	3	Unknown Protein
Solyc01g067930.2	250	267	375	499	598	136	Alpha-1 6-xylosyltransferase (Fragment)
Solyc01g067940.2	226	256	350	413	479	119	Unknown Protein
Solyc01g067950.1	1	0	0	1	1	1	Unknown Protein
Solyc01g067960.1	1	0	0	0	0	0	Unknown Protein
Solyc01g067970.1	1	0	0	0	0	0	Unknown Protein
Solyc01g067980.1	0	2	3	0	1	1	Protein phosphatase-2C
Solyc01g067990.1	4	6	7	0	4	0	Transducin family protein
Solyc01g068000.2	106	95	133	75	67	41	Serine/threonine phosphatase family protein
Solyc01g068020.2	78	90	116	56	47	24	Cyclase/dehydrase
Solyc01g068030.2	85	104	101	70	69	27	Cyclase/dehydrase
Solyc01g068040.1	391	61	27	3	1	0	3-5 exonuclease/ nucleic acid binding protein
Solyc01g068050.2	68	79	74	44	32	17	tRNA guanosine-2%26apos%3B-O-methyltransferase TRM13
Solyc01g068060.2	84	119	114	91	143	112	Autophagy-related protein 8
Solyc01g068070.2	75	114	115	46	32	17	Wd-repeat protein
Solyc01g068080.2	9645	122	103	57	40	45	Dihydroflavonol 4-reductase family
Solyc01g068090.1	0	0	4	0	1	0	Unknown Protein
Solyc01g068100.2	1134	1199	1547	1278	1051	640	Squamosa promoter binding protein-like 1
Solyc01g068110.2	44	91	75	13341	33588	33991	Unknown Protein
Solyc01g068120.2	39	69	64	9865	25366	24645	Pectinesterase
Solyc01g068130.2	174	195	204	239	228	204	Os05g0272200 protein (Fragment)
Solyc01g068140.2	24	22	16	29	21	3	10-deacetylbaccatin III-10-O-acetyl transferase-like
Solyc01g068150.2	56	74	99	41	35	14	Chromosome 11 contig 1 DNA sequence
Solyc01g068160.2	194	244	314	237	204	83	Cysteine desulfurase like
Solyc01g068170.2	103	93	86	77	65	25	Oxidoreductase/ transition metal ion binding protein
Solyc01g068180.2	57	67	78	52	38	16	Pentatricopeptide repeat-containing protein
Solyc01g068190.2	42	55	65	35	40	27	Unknown Protein
Solyc01g068200.2	140	158	223	172	171	48	Abscisic acid insensitive 8 homologue (Fragment)
Solyc01g068210.2	281	301	385	320	269	159	Glutamate dehydrogenase
Solyc01g068230.1	5	1	1	0	0	3	Ulp1 protease family C-terminal catalytic domain containing protein
Solyc01g068240.2	257	334	386	312	183	76	Ubiquitin carboxyl-terminal hydrolase
Solyc01g068250.2	152	34	24	13	11	5	WD-40 repeat family protein
Solyc01g068260.2	156	184	160	59	49	22	BRCT domain-containing protein
Solyc01g068270.2	282	303	348	284	274	195	Receptor-like kinase
Solyc01g068280.2	228	203	149	115	149	39	Chromodomain-helicase-DNA-binding protein 1-like
Solyc01g068290.2	98	125	115	62	59	24	tRNA uridine 5-carboxymethylaminomethyl modification enzyme mnmG
Solyc01g068300.1	4	7	48	16	15	3	DNA repair protein
Solyc01g068320.1	19	34	184	65	48	8	DNA repair protein
Solyc01g068330.2	181	251	264	219	146	74	Cell division protease ftsH homolog
Solyc01g068340.2	20	13	16	18	9	5	Crossover junction endonuclease mus81
Solyc01g068350.2	23	29	14	10	9	4	Crossover junction endonuclease MUS81
Solyc01g068360.2	39	48	57	27	27	17
Solyc01g068370.2	20	24	28	23	22	25	Histone-lysine N-methyltransferase%2C H3 lysine-9 specific 3
Solyc01g068380.2	12	6	93	1623	1409	22	Purple acid phosphatase
Solyc01g068390.2	310	269	298	275	264	134	Zinc finger family protein
Solyc01g068400.2	154	166	154	139	92	43	Tubulin-specific chaperone A
Solyc01g068410.2	53	42	82	229	187	10	Auxin Efflux Carrier
Solyc01g068430.1	1	2	2	1	0	0	Os06g0207500 protein (Fragment)
Solyc01g068440.1	4	0	0	1	1	1	Os06g0207500 protein (Fragment)
Solyc01g068450.2	49	28	70	68	80	29	Genomic DNA chromosome 3 P1 clone MSJ11
Solyc01g068460.2	106	190	165	141	154	86	Pathogen-induced calmodulin-binding protein (Fragment)
Solyc01g068470.2	55	59	40	26	28	9	CM0216.540.nc protein (Fragment)
Solyc01g068480.2	286	391	371	256	247	118	Embryo defective 2765 (Fragment)
Solyc01g068490.2	16	4	14	2	6	8	U-box domain-containing protein
Solyc01g068500.2	15	67	171	311	362	40	Early-responsive to dehydration protein-like
Solyc01g068510.1	0	2	1	0	4	1	Unknown Protein
Solyc01g068520.1	0	0	0	0	0	1	Unknown Protein
Solyc01g068530.2	1272	1791	1646	947	637	181	30S ribosomal protein S9
Solyc01g068540.2	103	17	34	8	3	0	Unknown Protein
Solyc01g068550.2	4	3	4	1	0	1	O-methyltransferase
Solyc01g068560.2	241	245	213	70	83	55	Unknown Protein
Solyc01g068580.2	102	132	154	78	66	24	C9orf78
[truncated: 28,946 more rows]
